# Supplementary material for: Precise and Cost-Effective Nanopore Sequencing for Post-GWAS Fine-Mapping and Causal Variant Identification
Source: PubMed Central journal article supplement — iScience. 2020 Mar 9;23(4):100971. doi: 10.1016/j.isci.2020.100971 (PMC7096756; doi:10.1016/j.isci.2020.100971), 2020-03-09
Supplement: mmc1.pdf [file mmc1.pdf]

iScience, Volume 23

## **Supplemental Information**

### **Precise and Cost-Effective Nanopore Sequencing for Post-GWAS Fine-Mapping and Causal Variant Identification**

**Tarek Magdy, Hui-Hsuan Kuo, and Paul W. Burridge**

**A**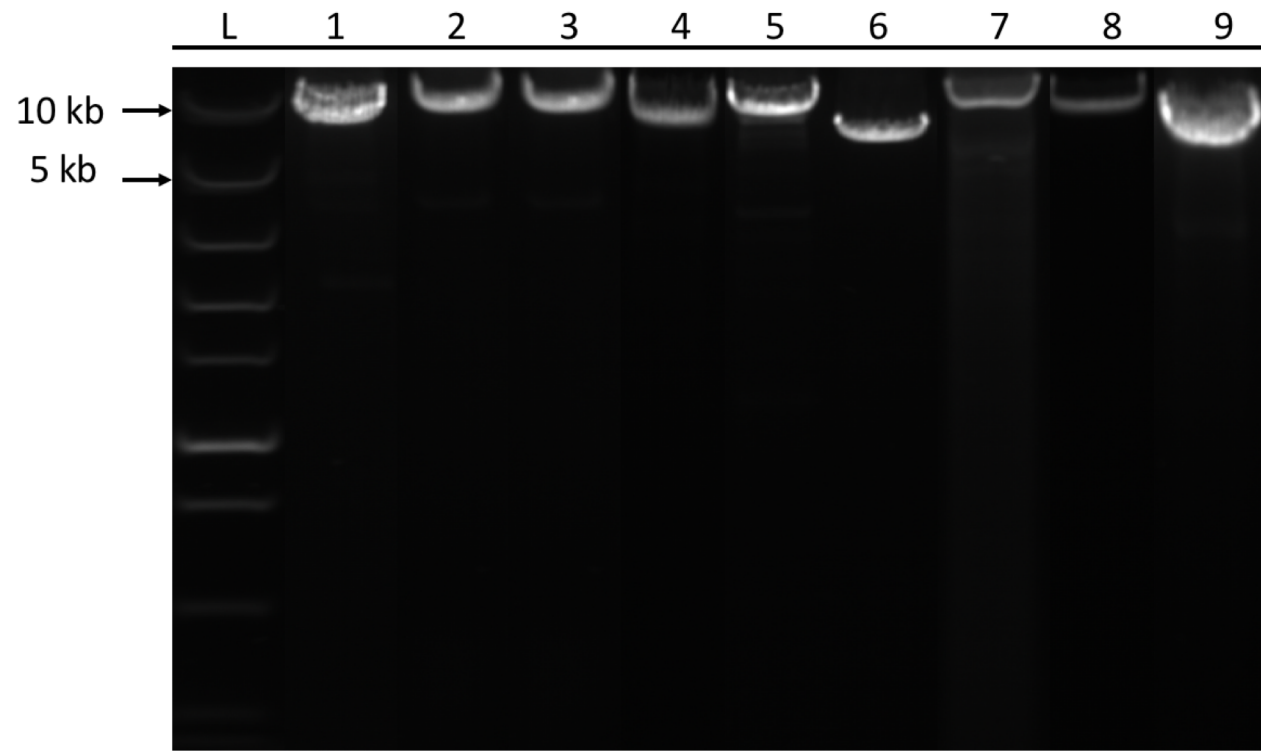**B**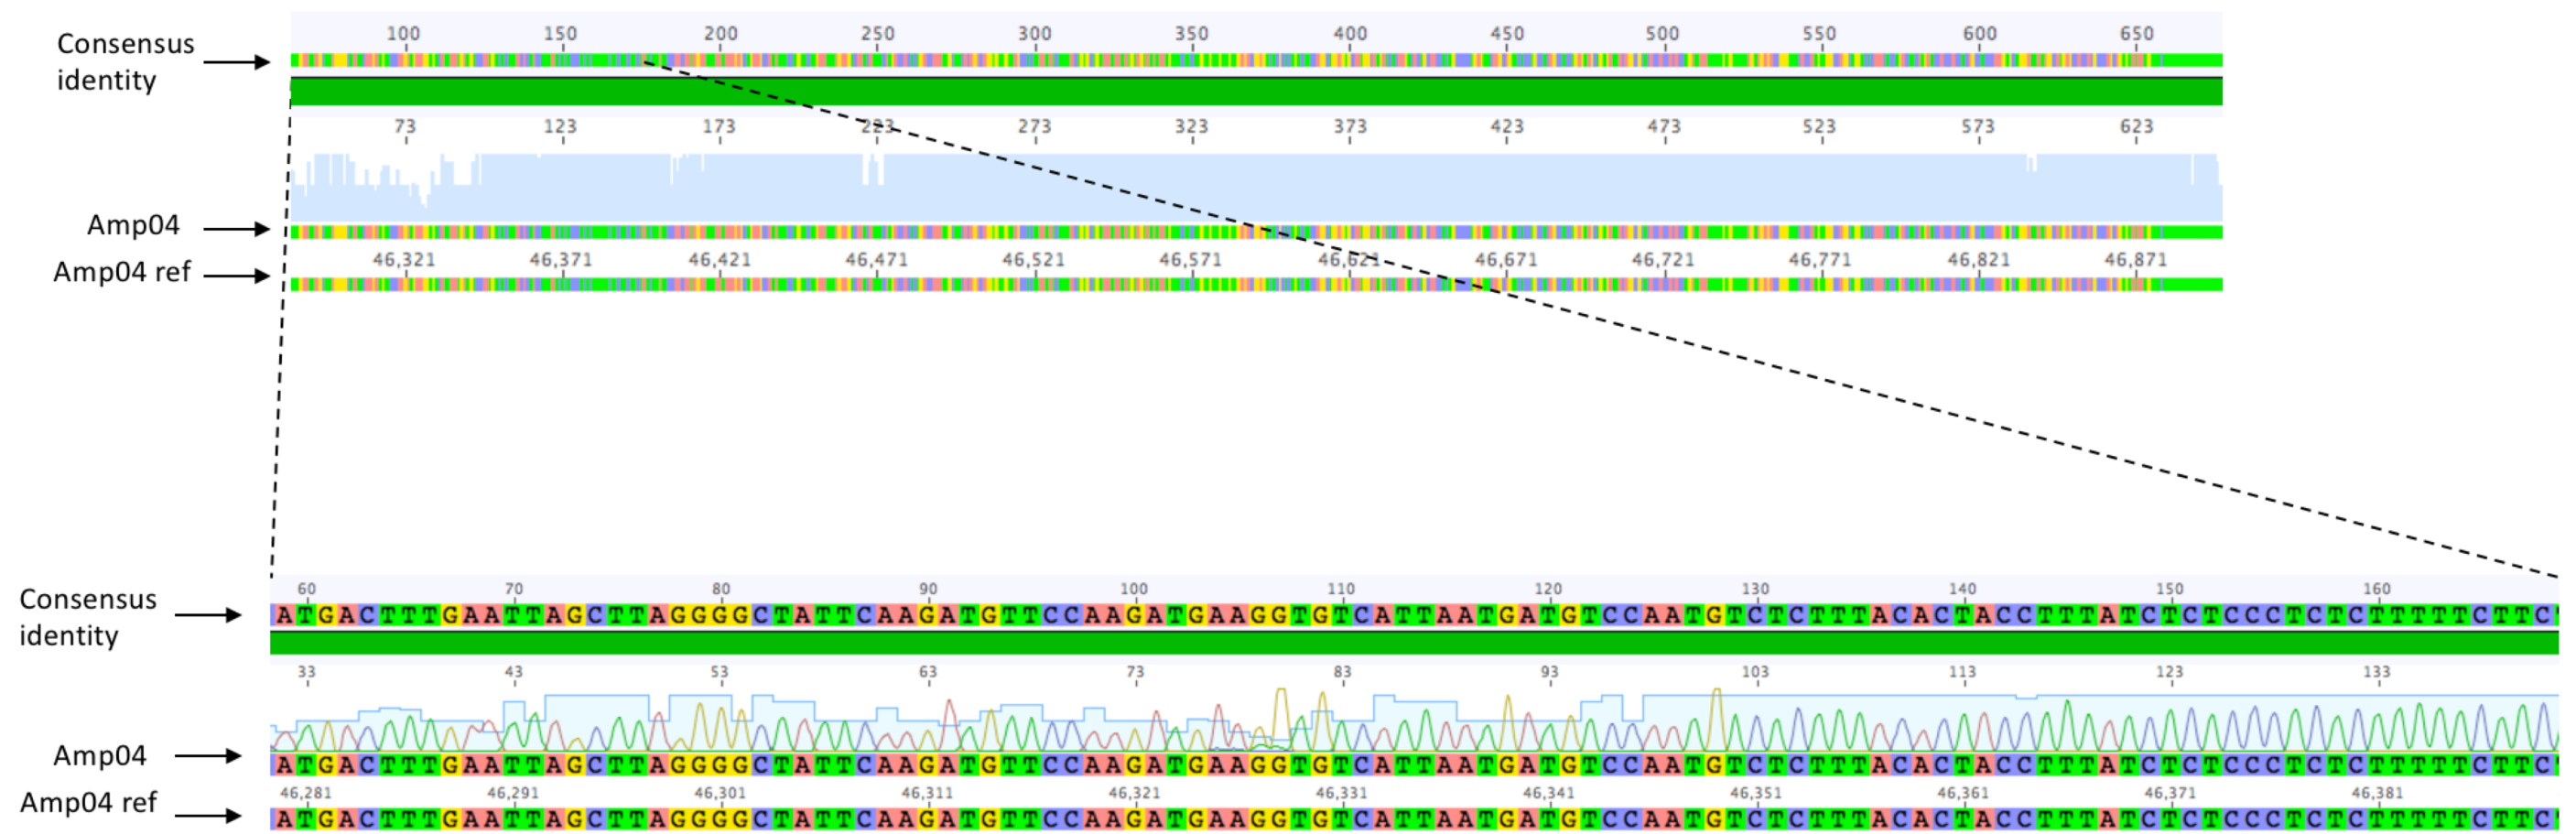**Figure S1**

(a)

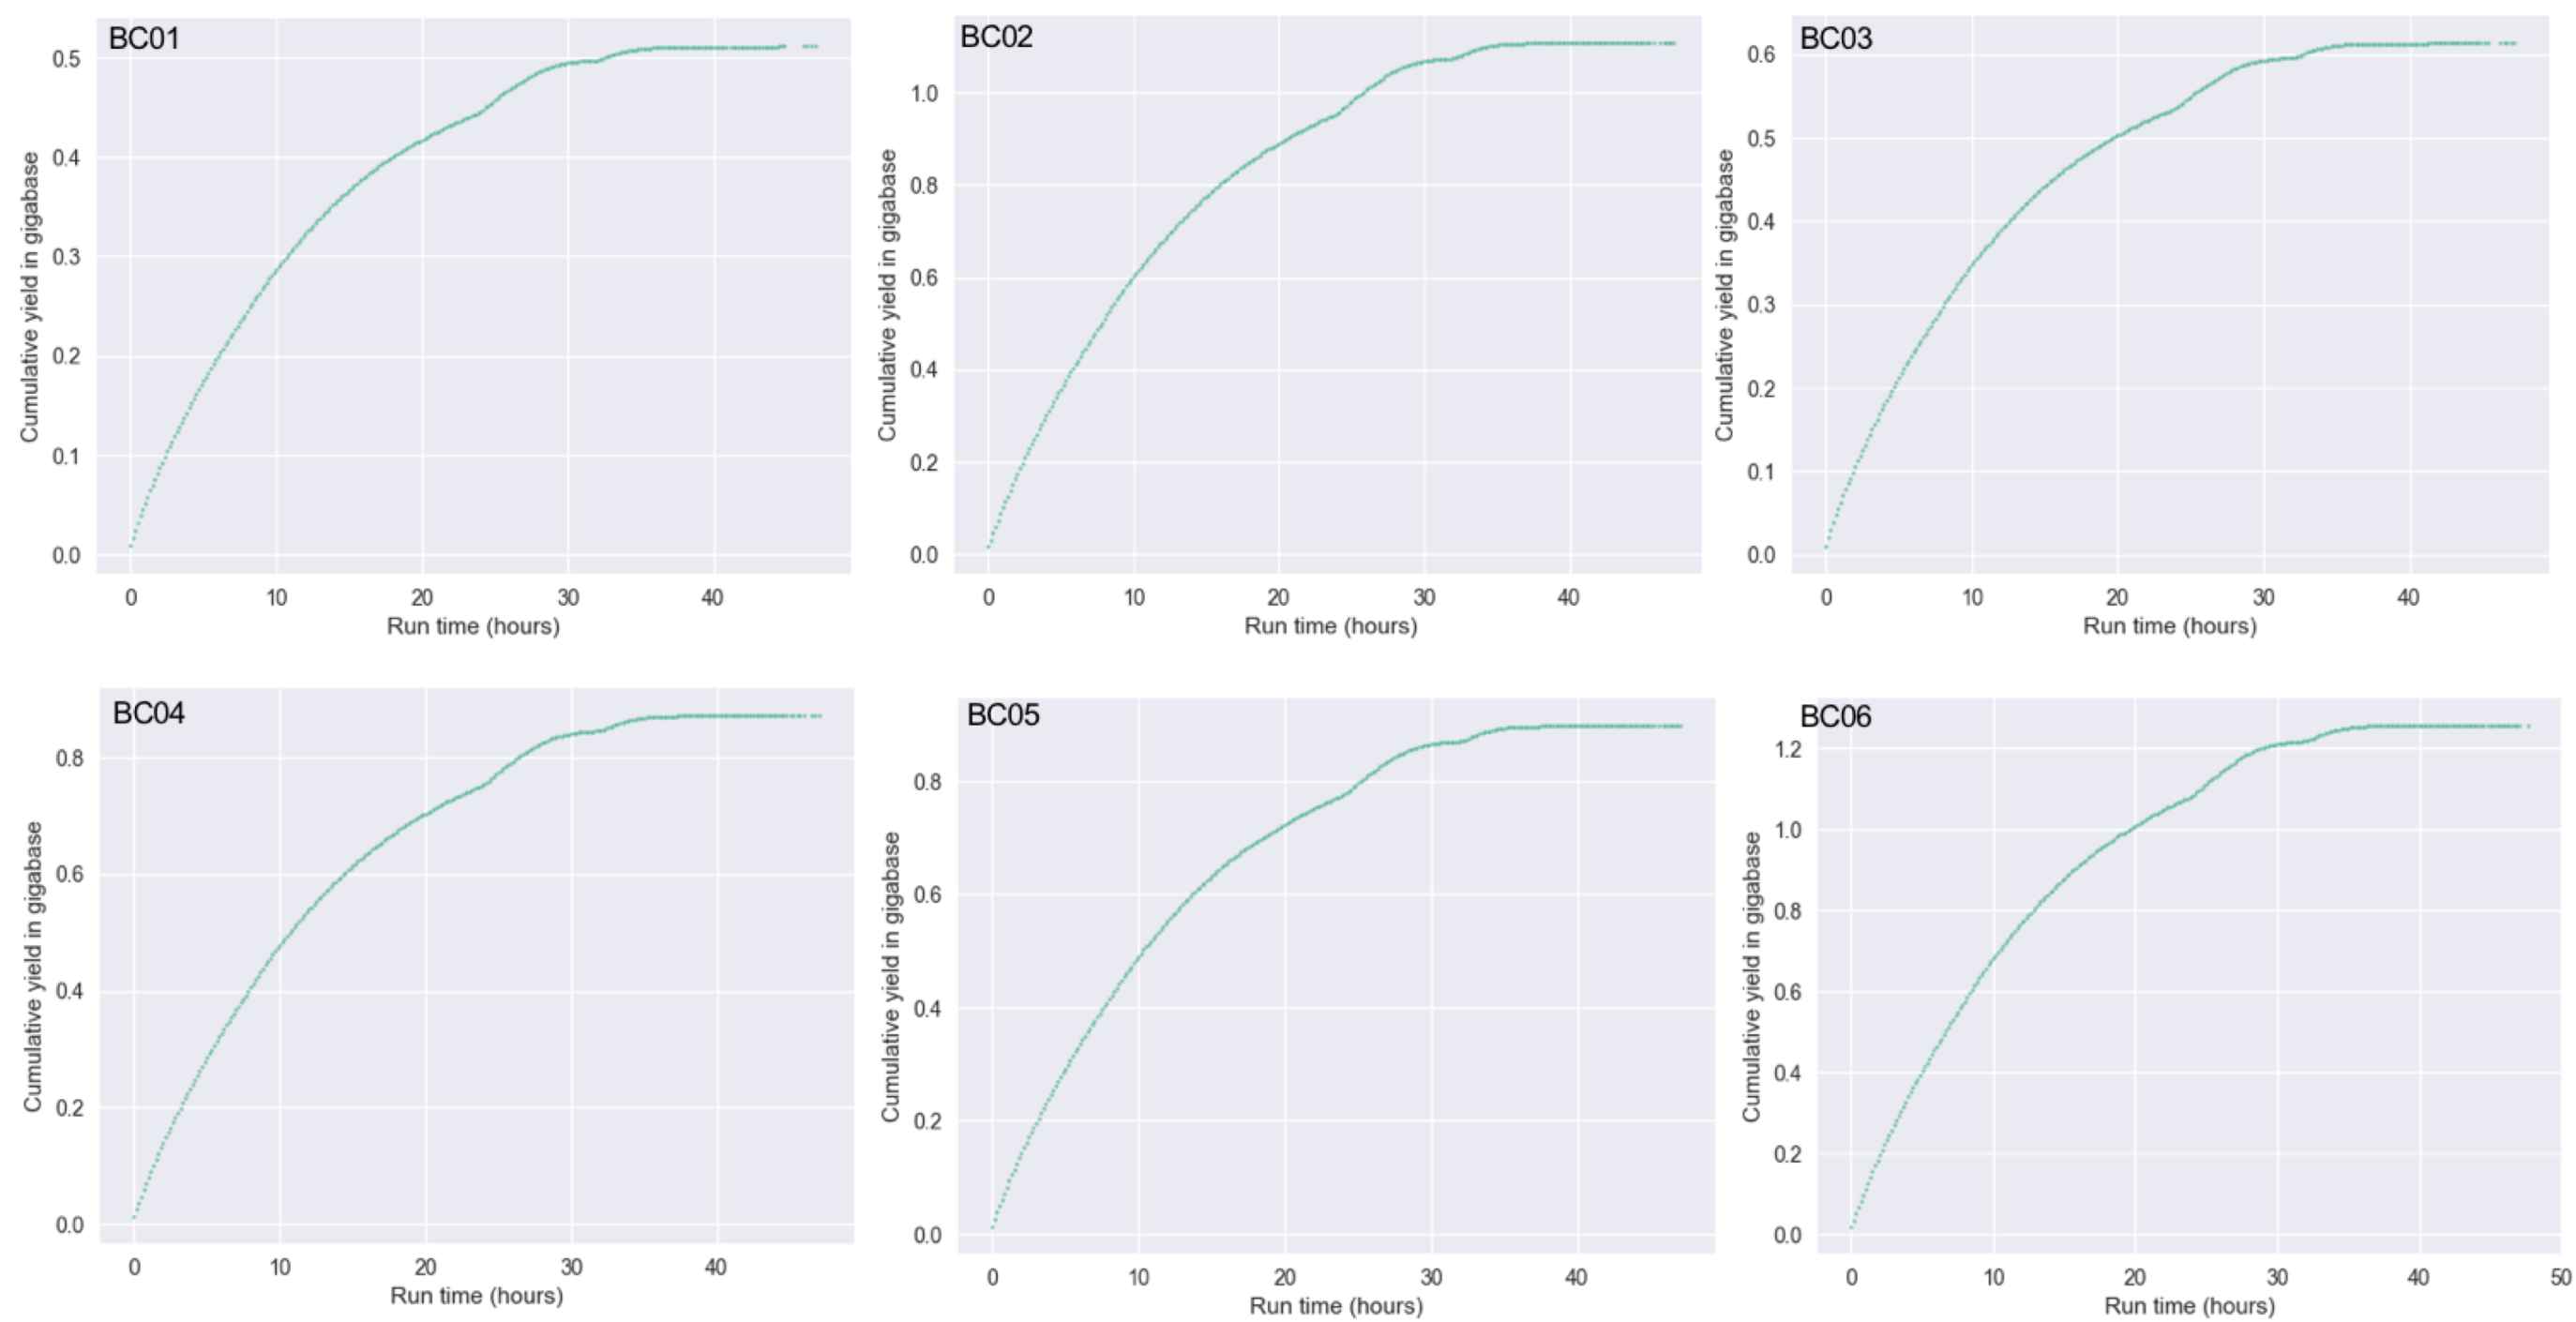

(b)

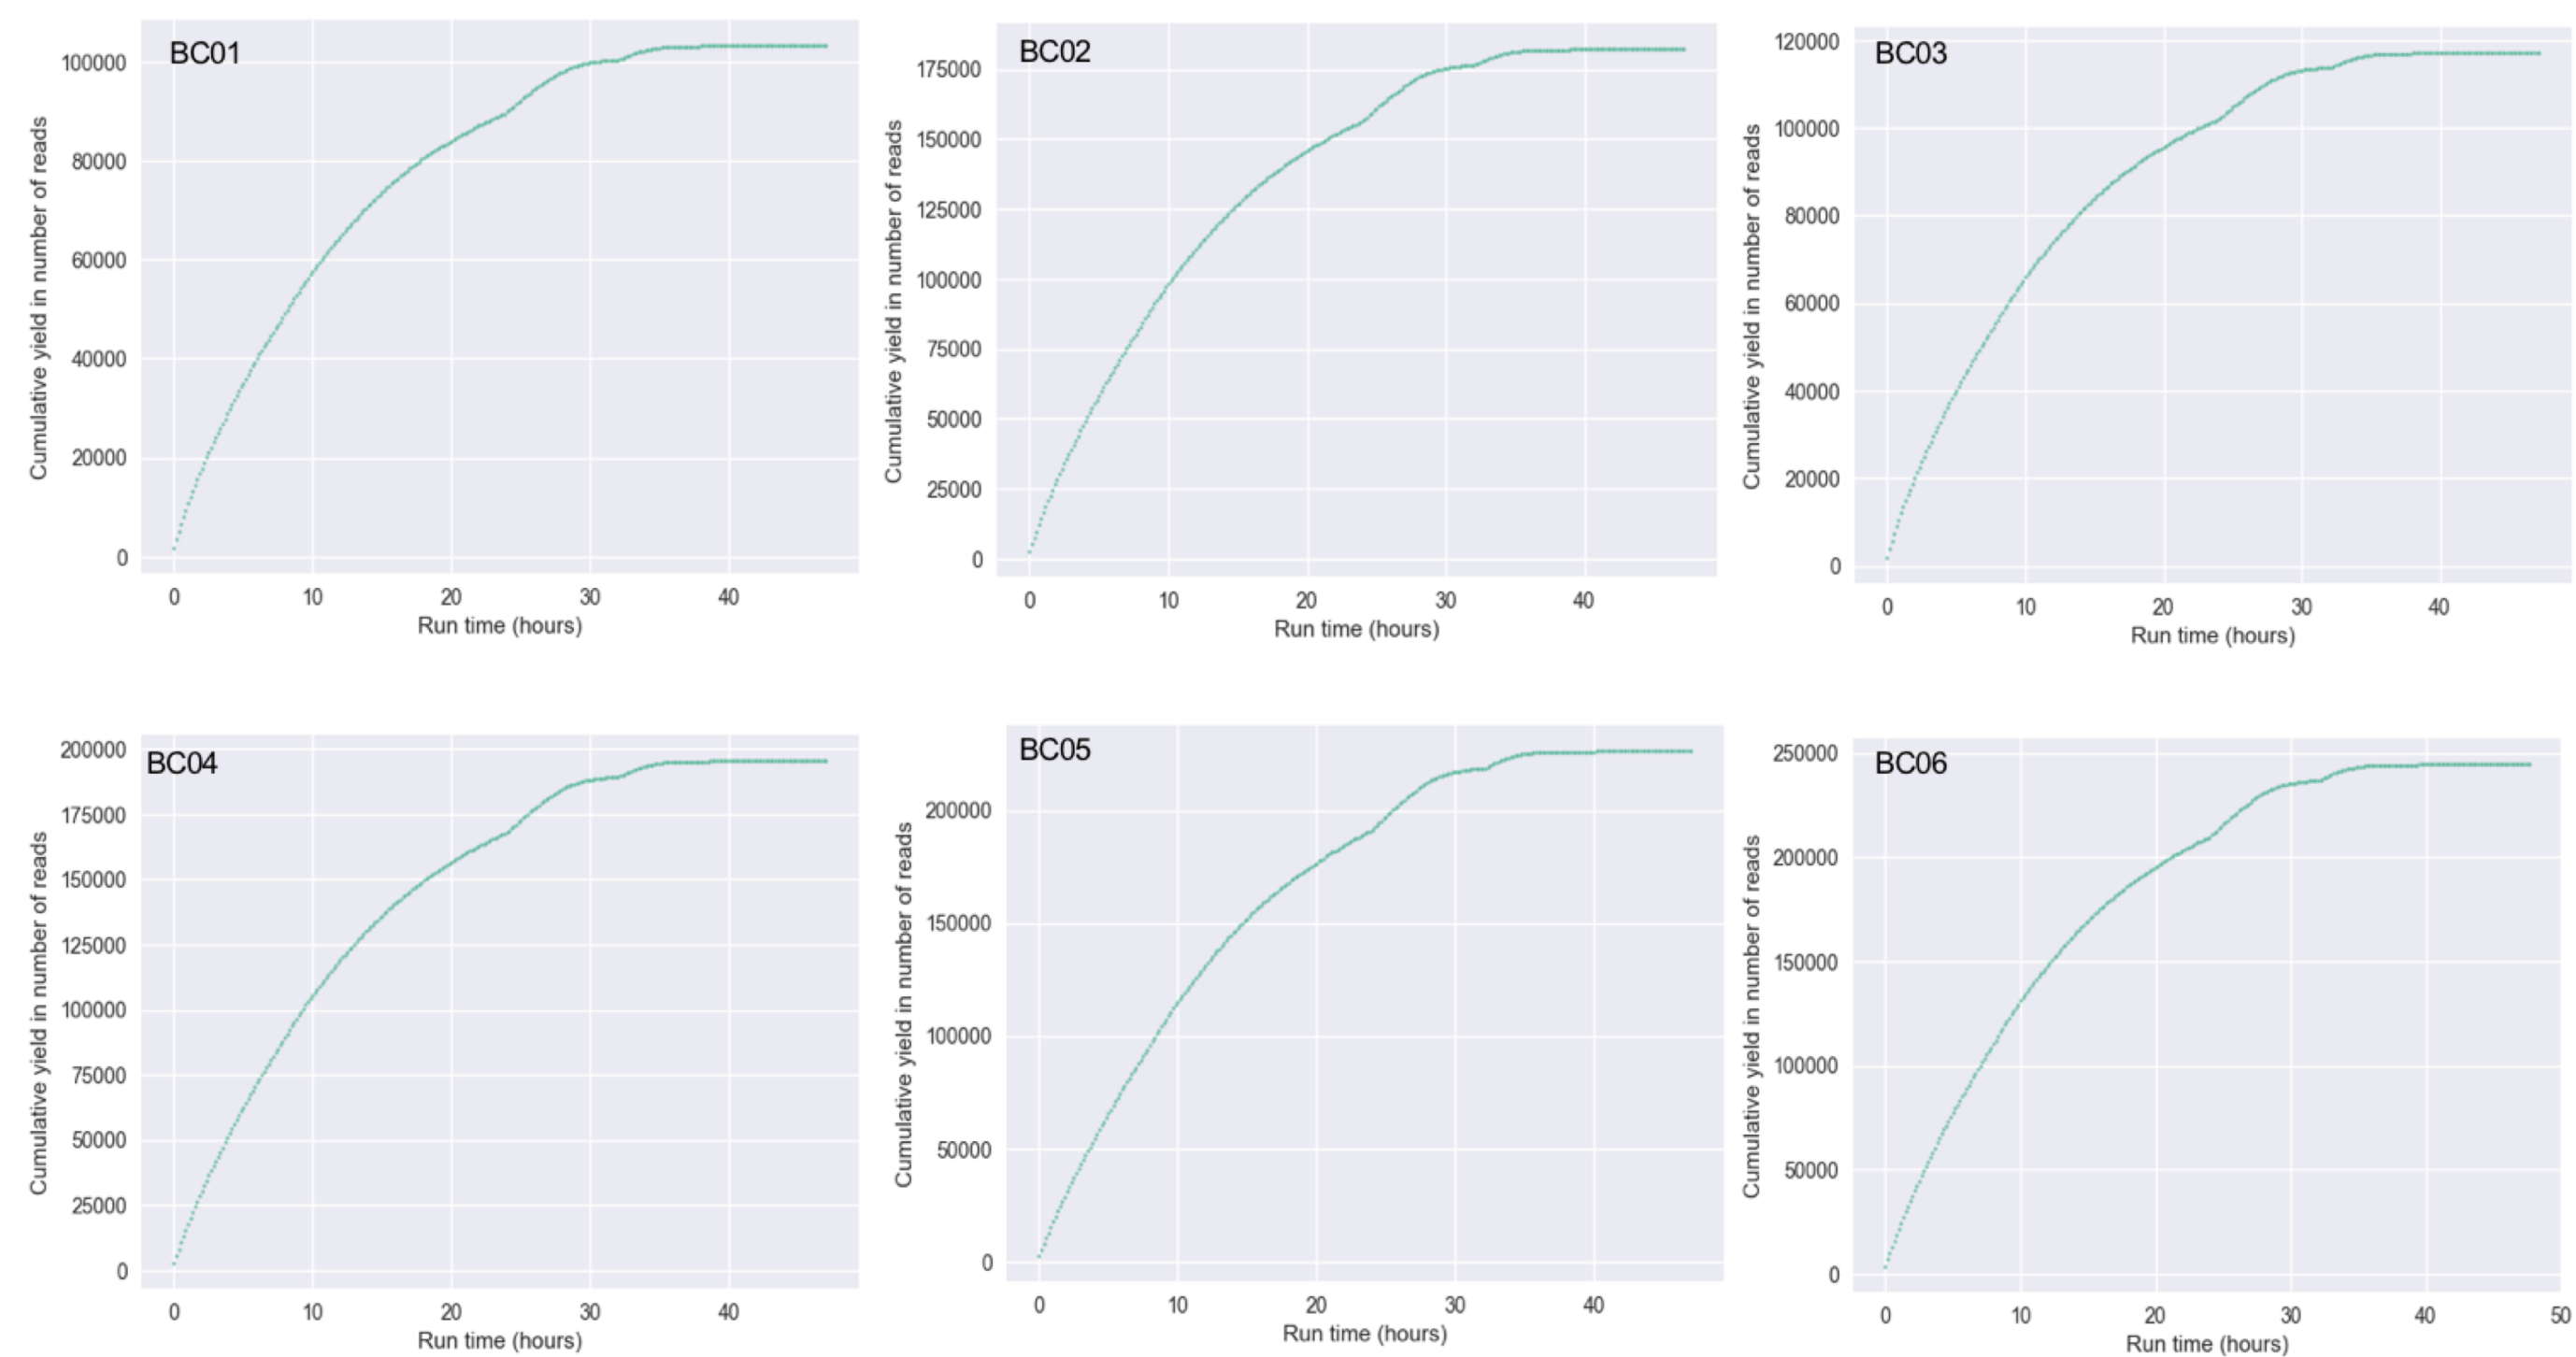

Figure S2

**A**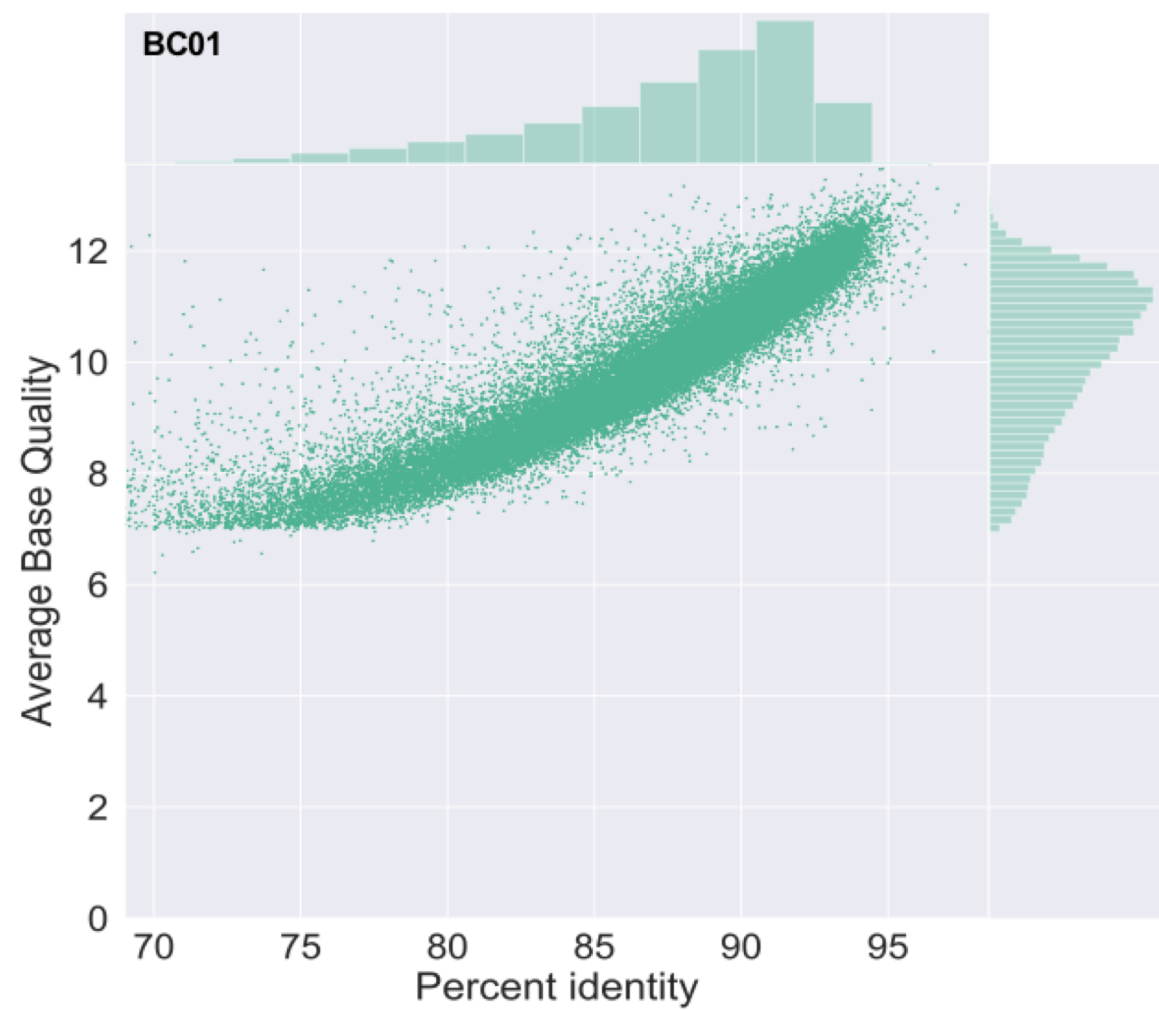**B**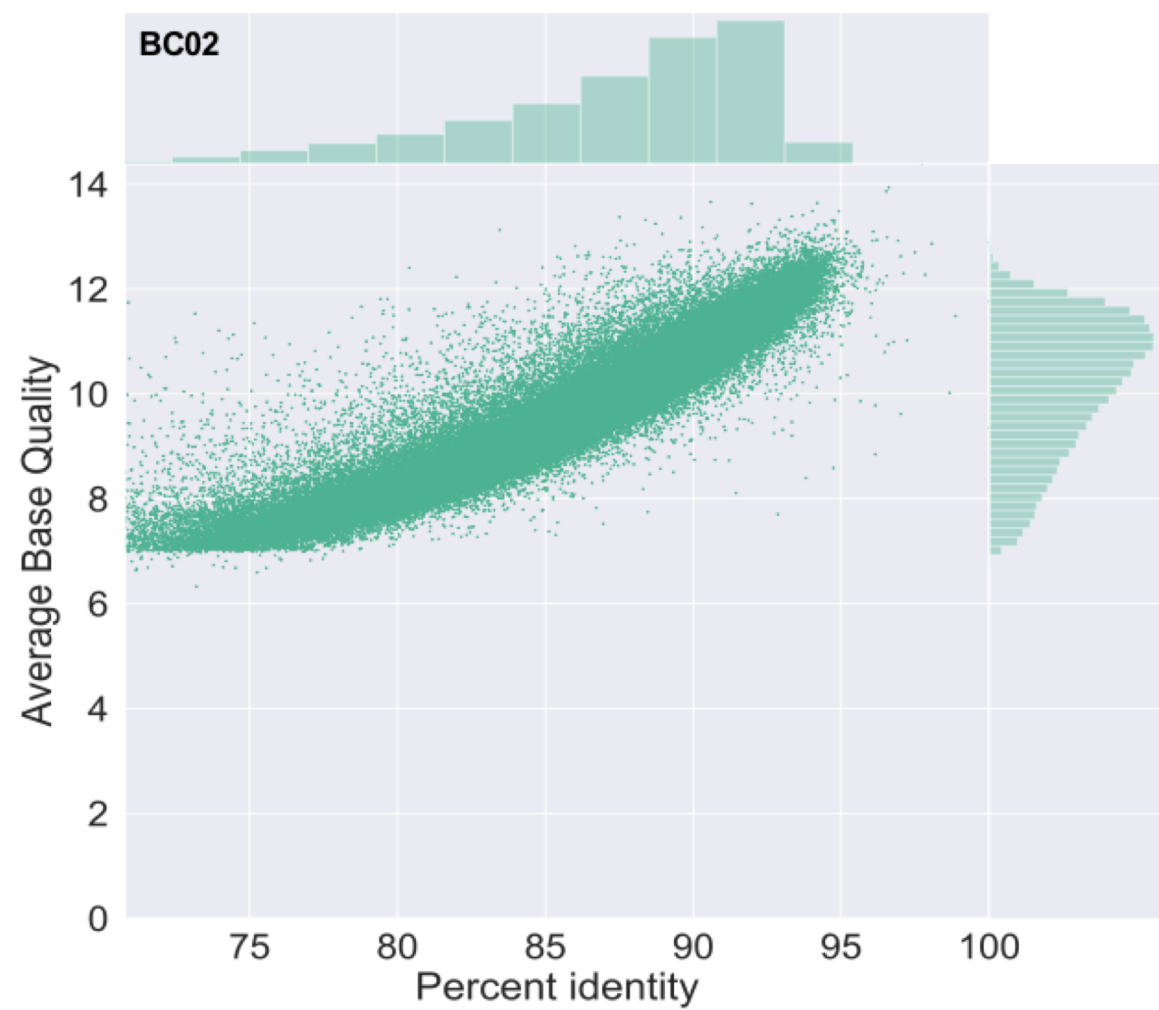**Figure S1****C**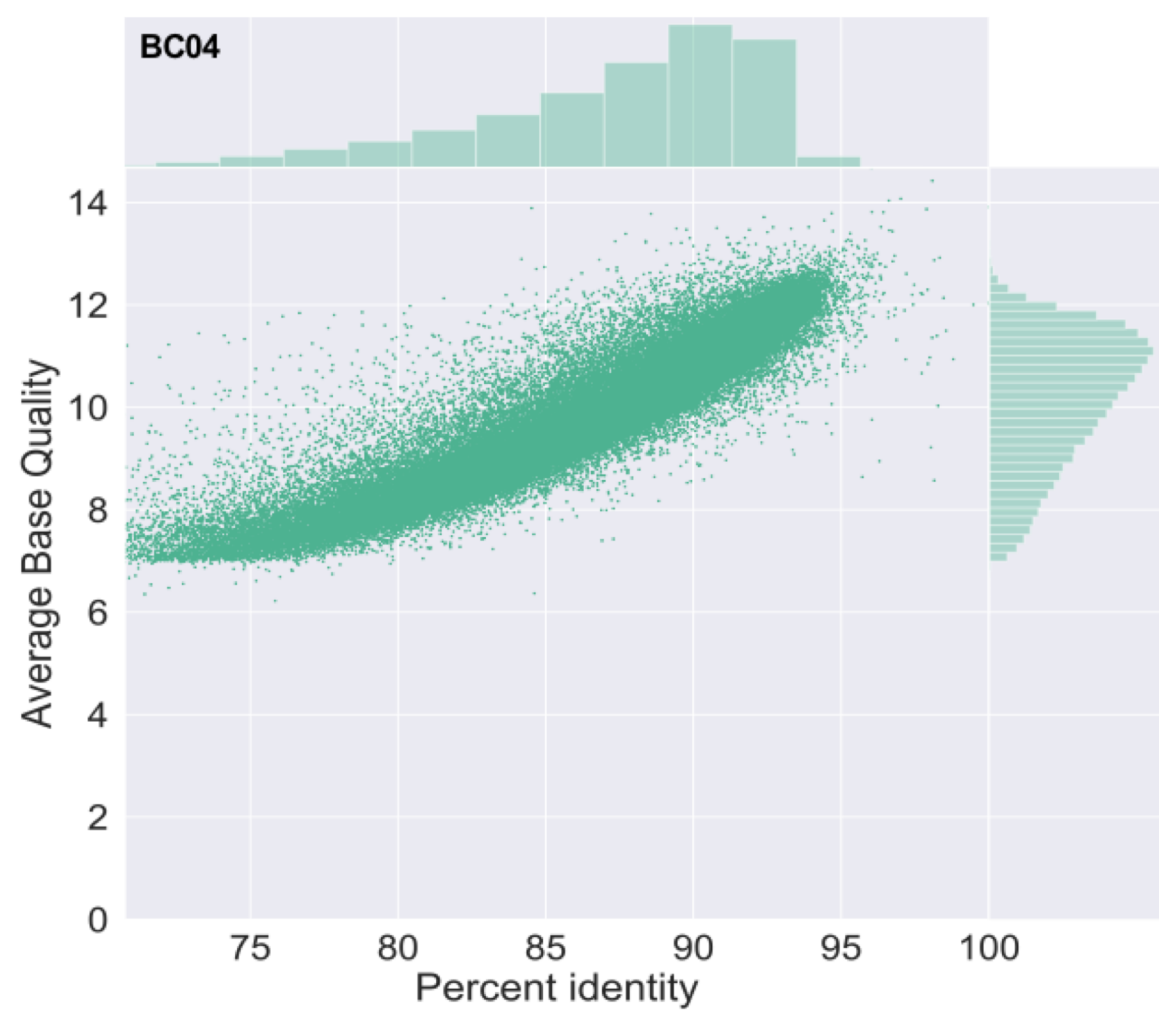**D**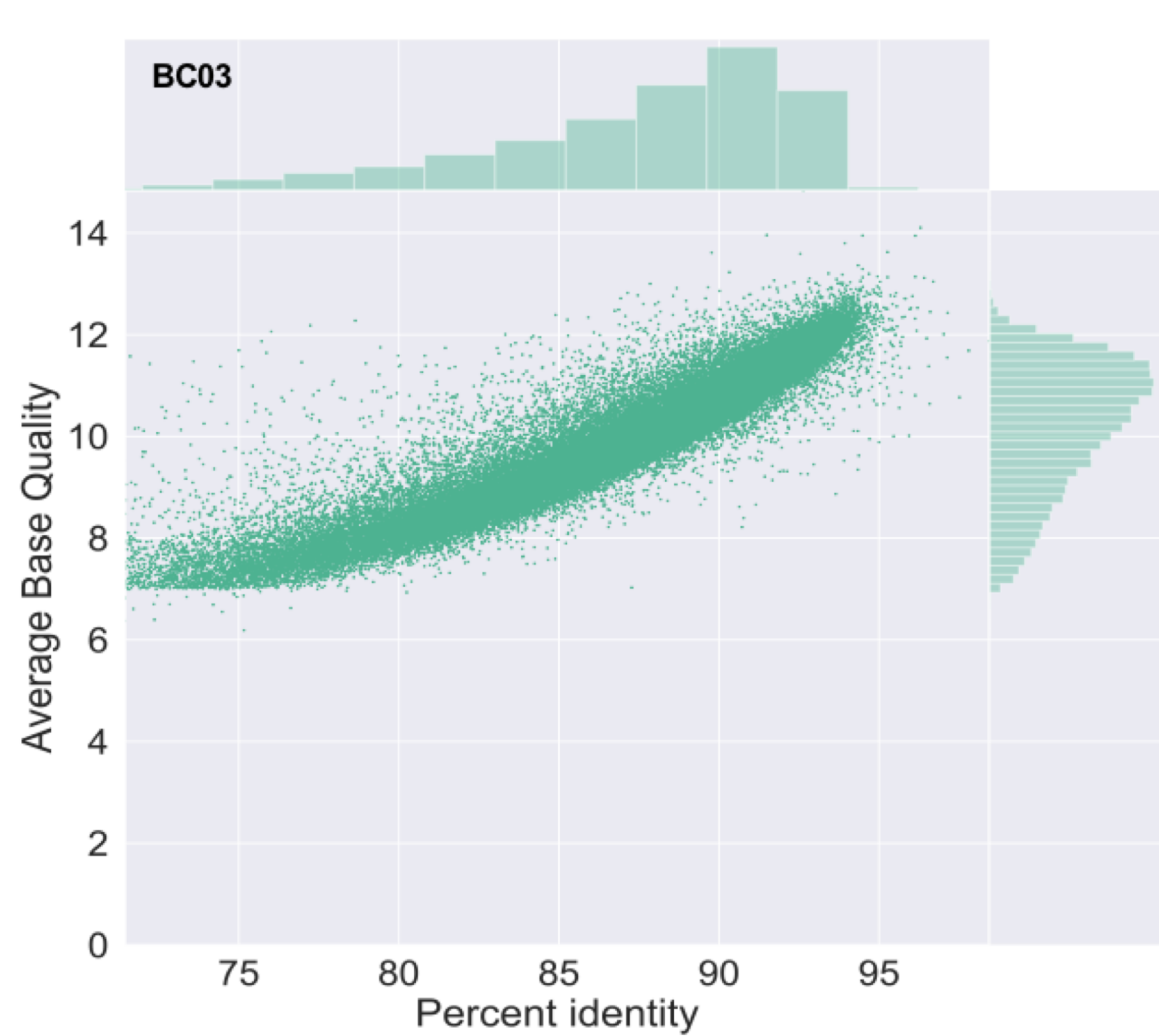**E**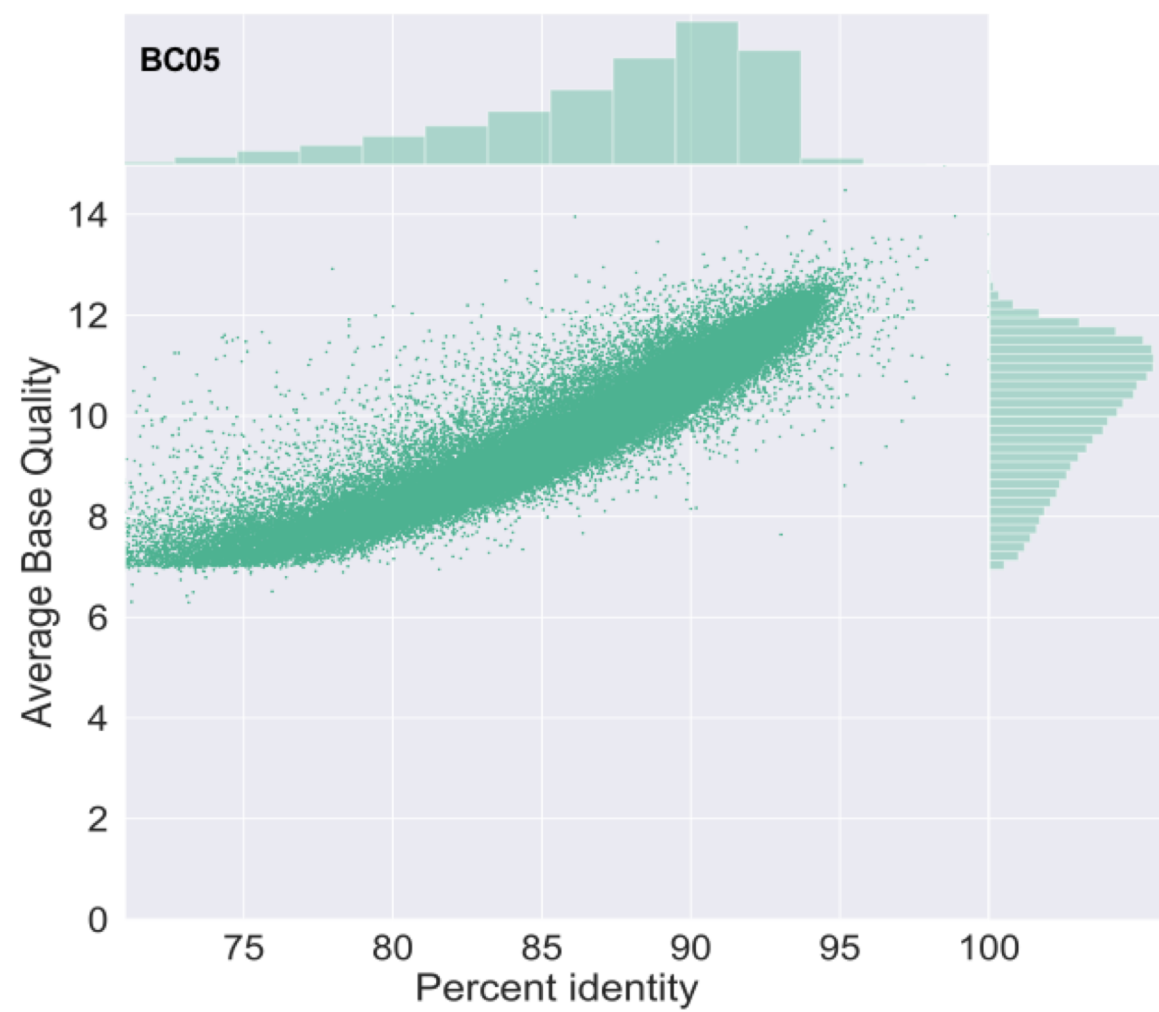**F**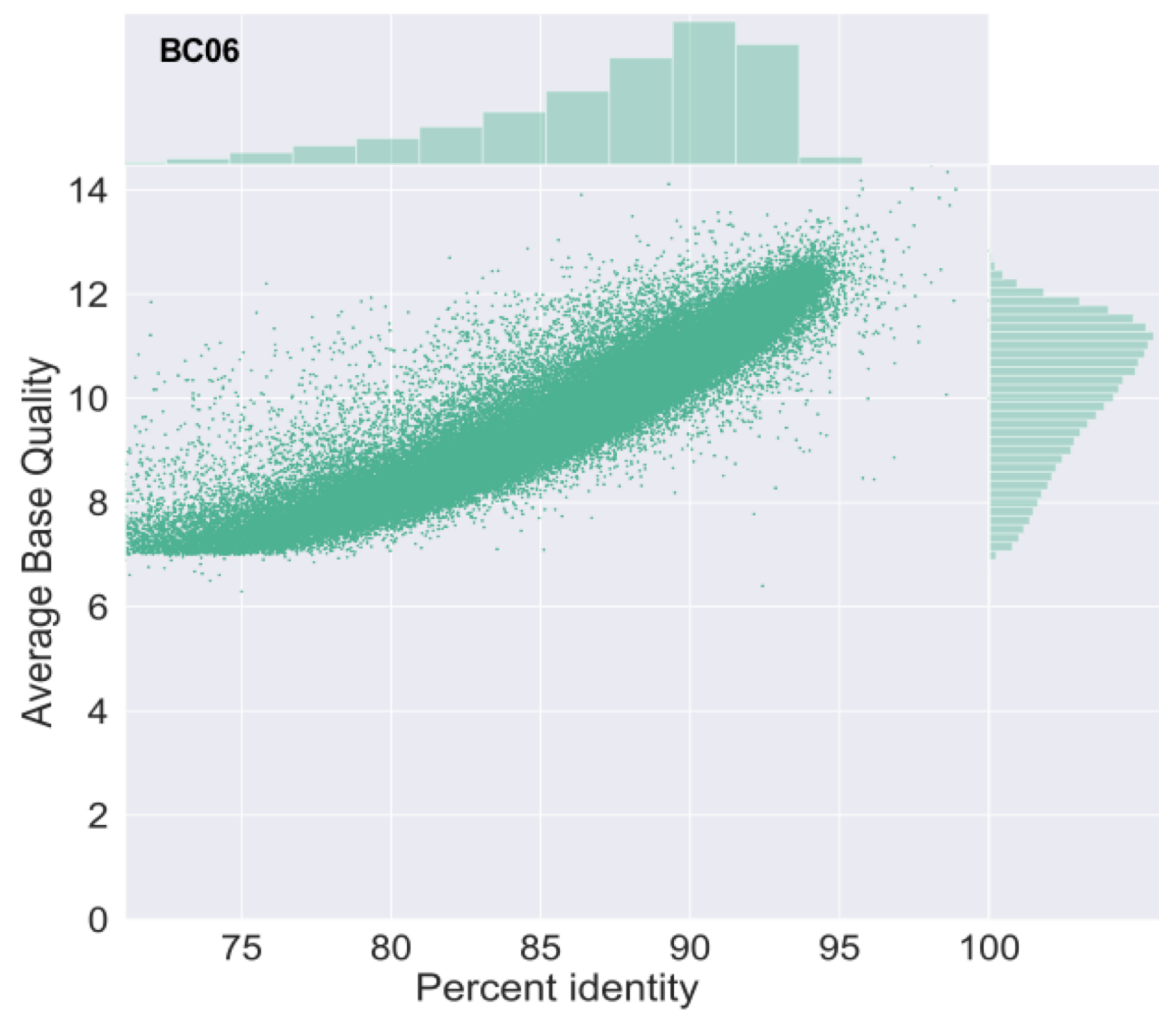**Figure S3**

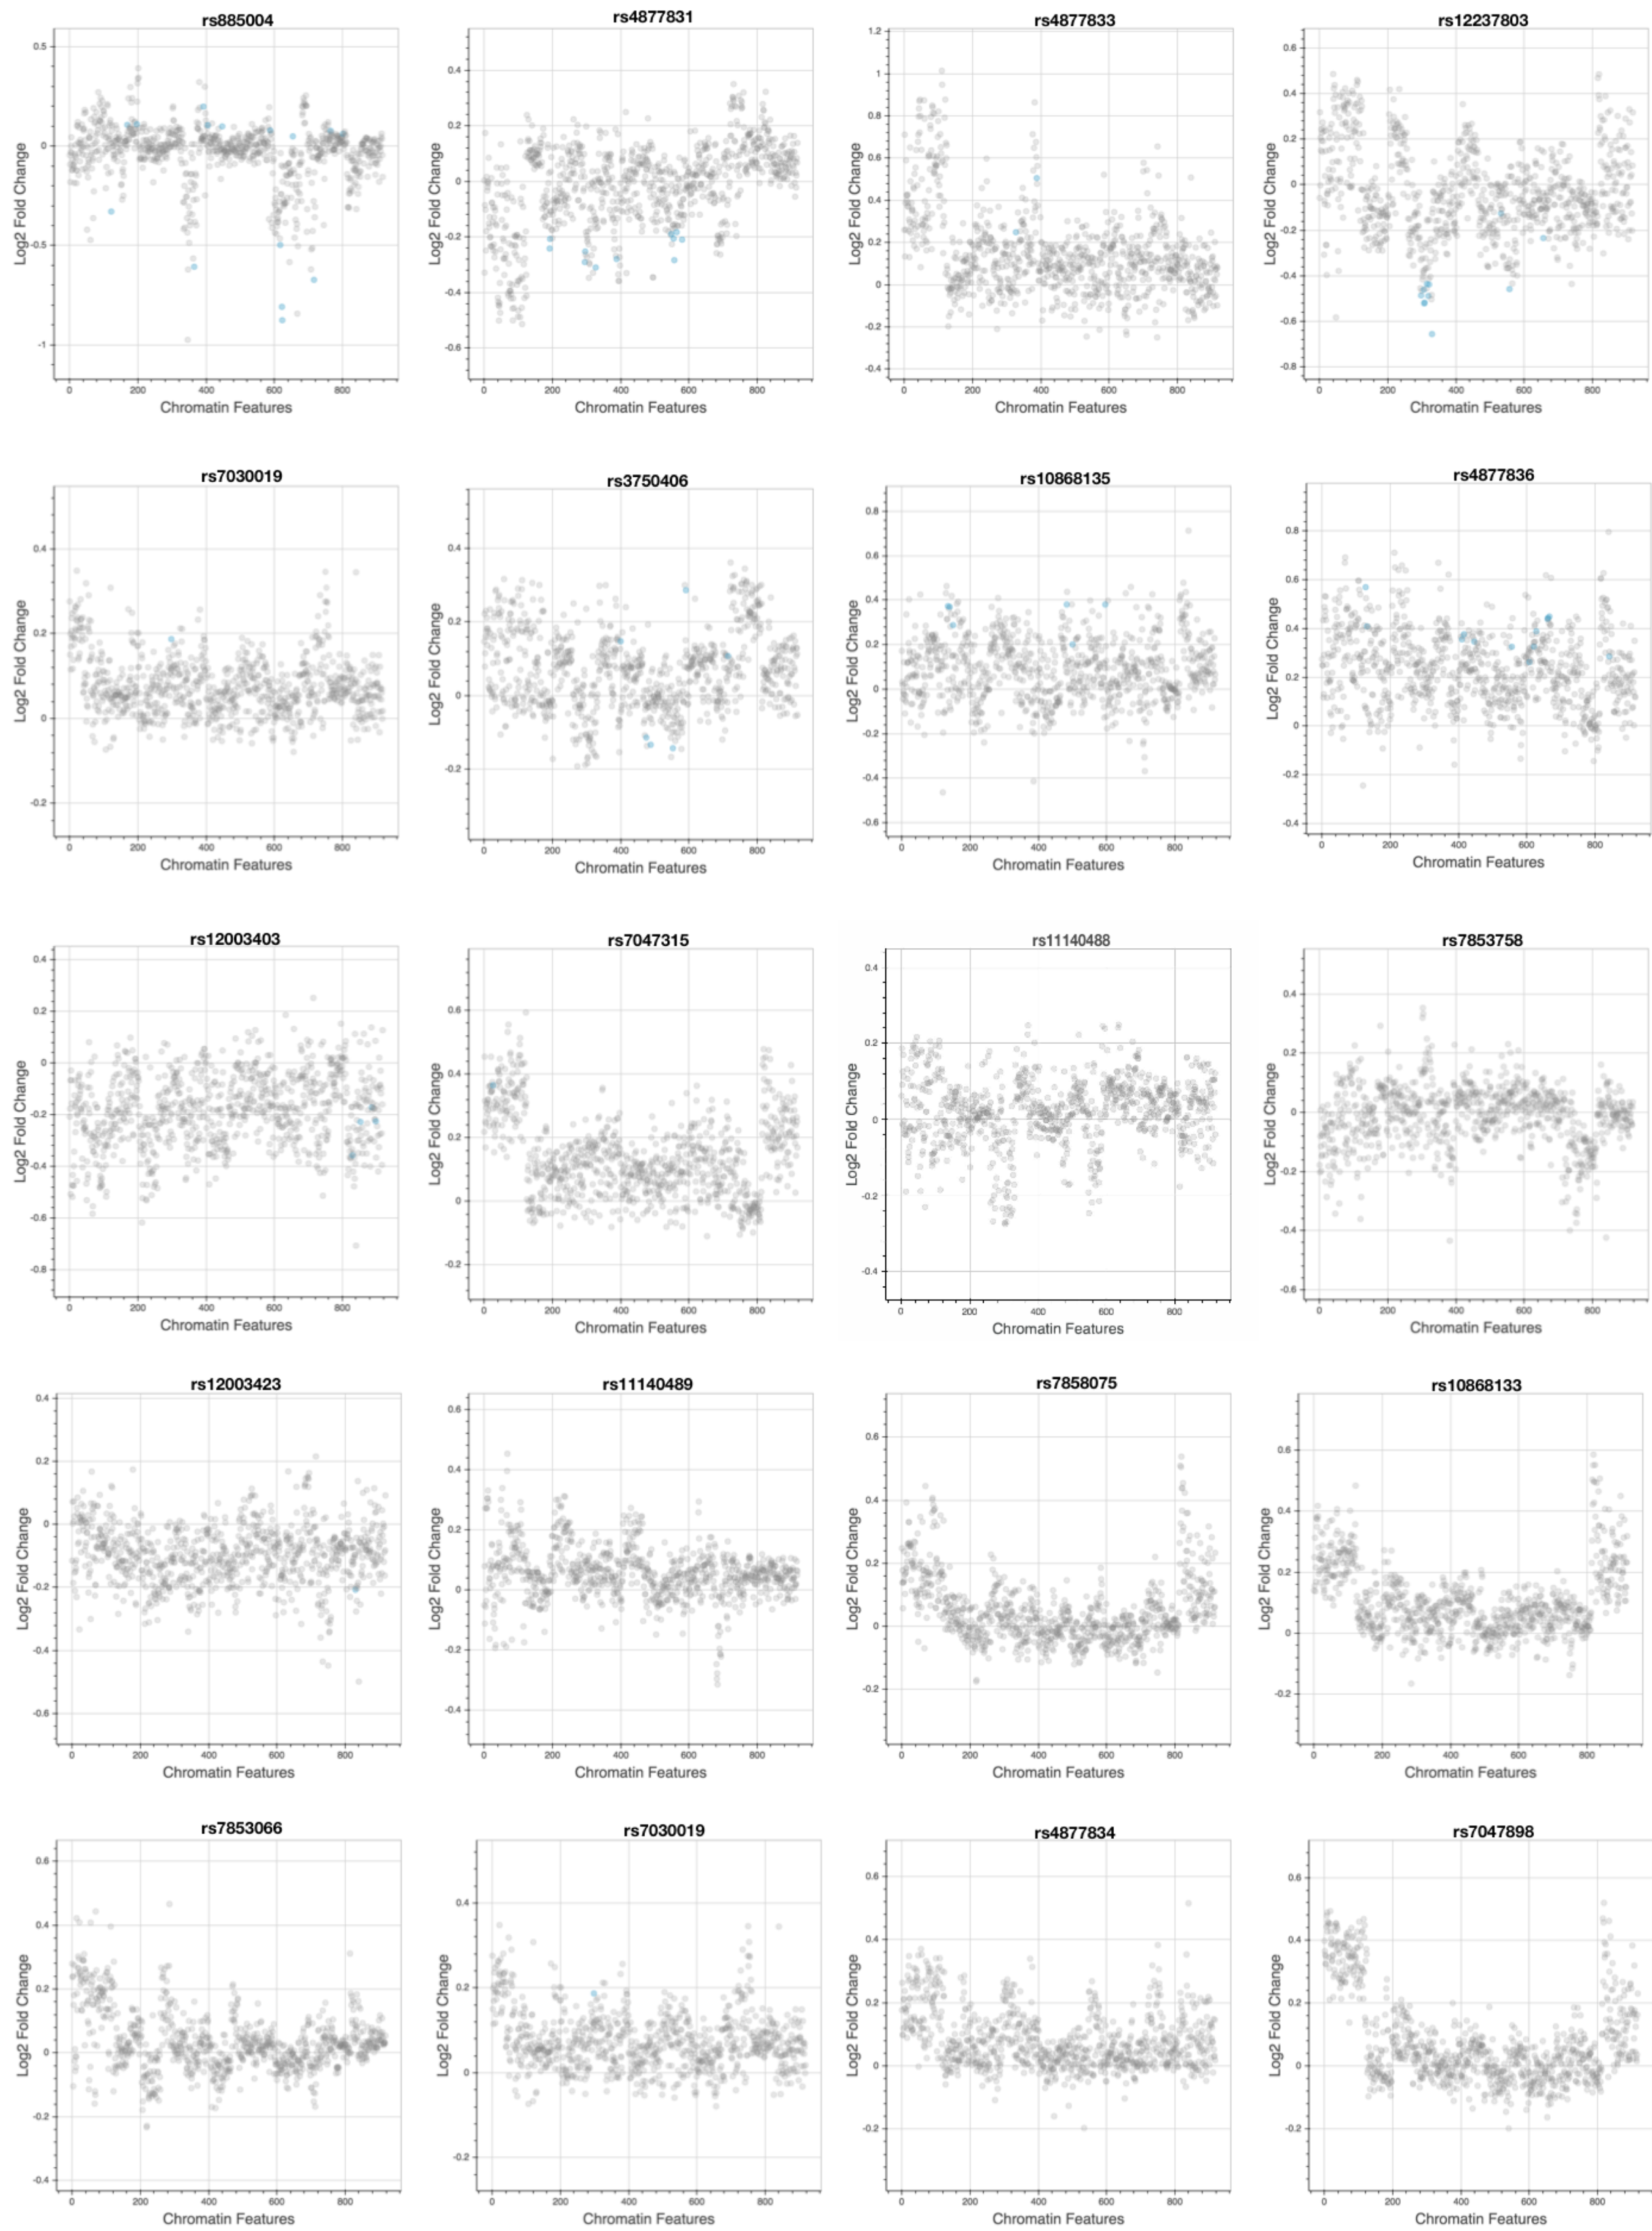

Figure S4

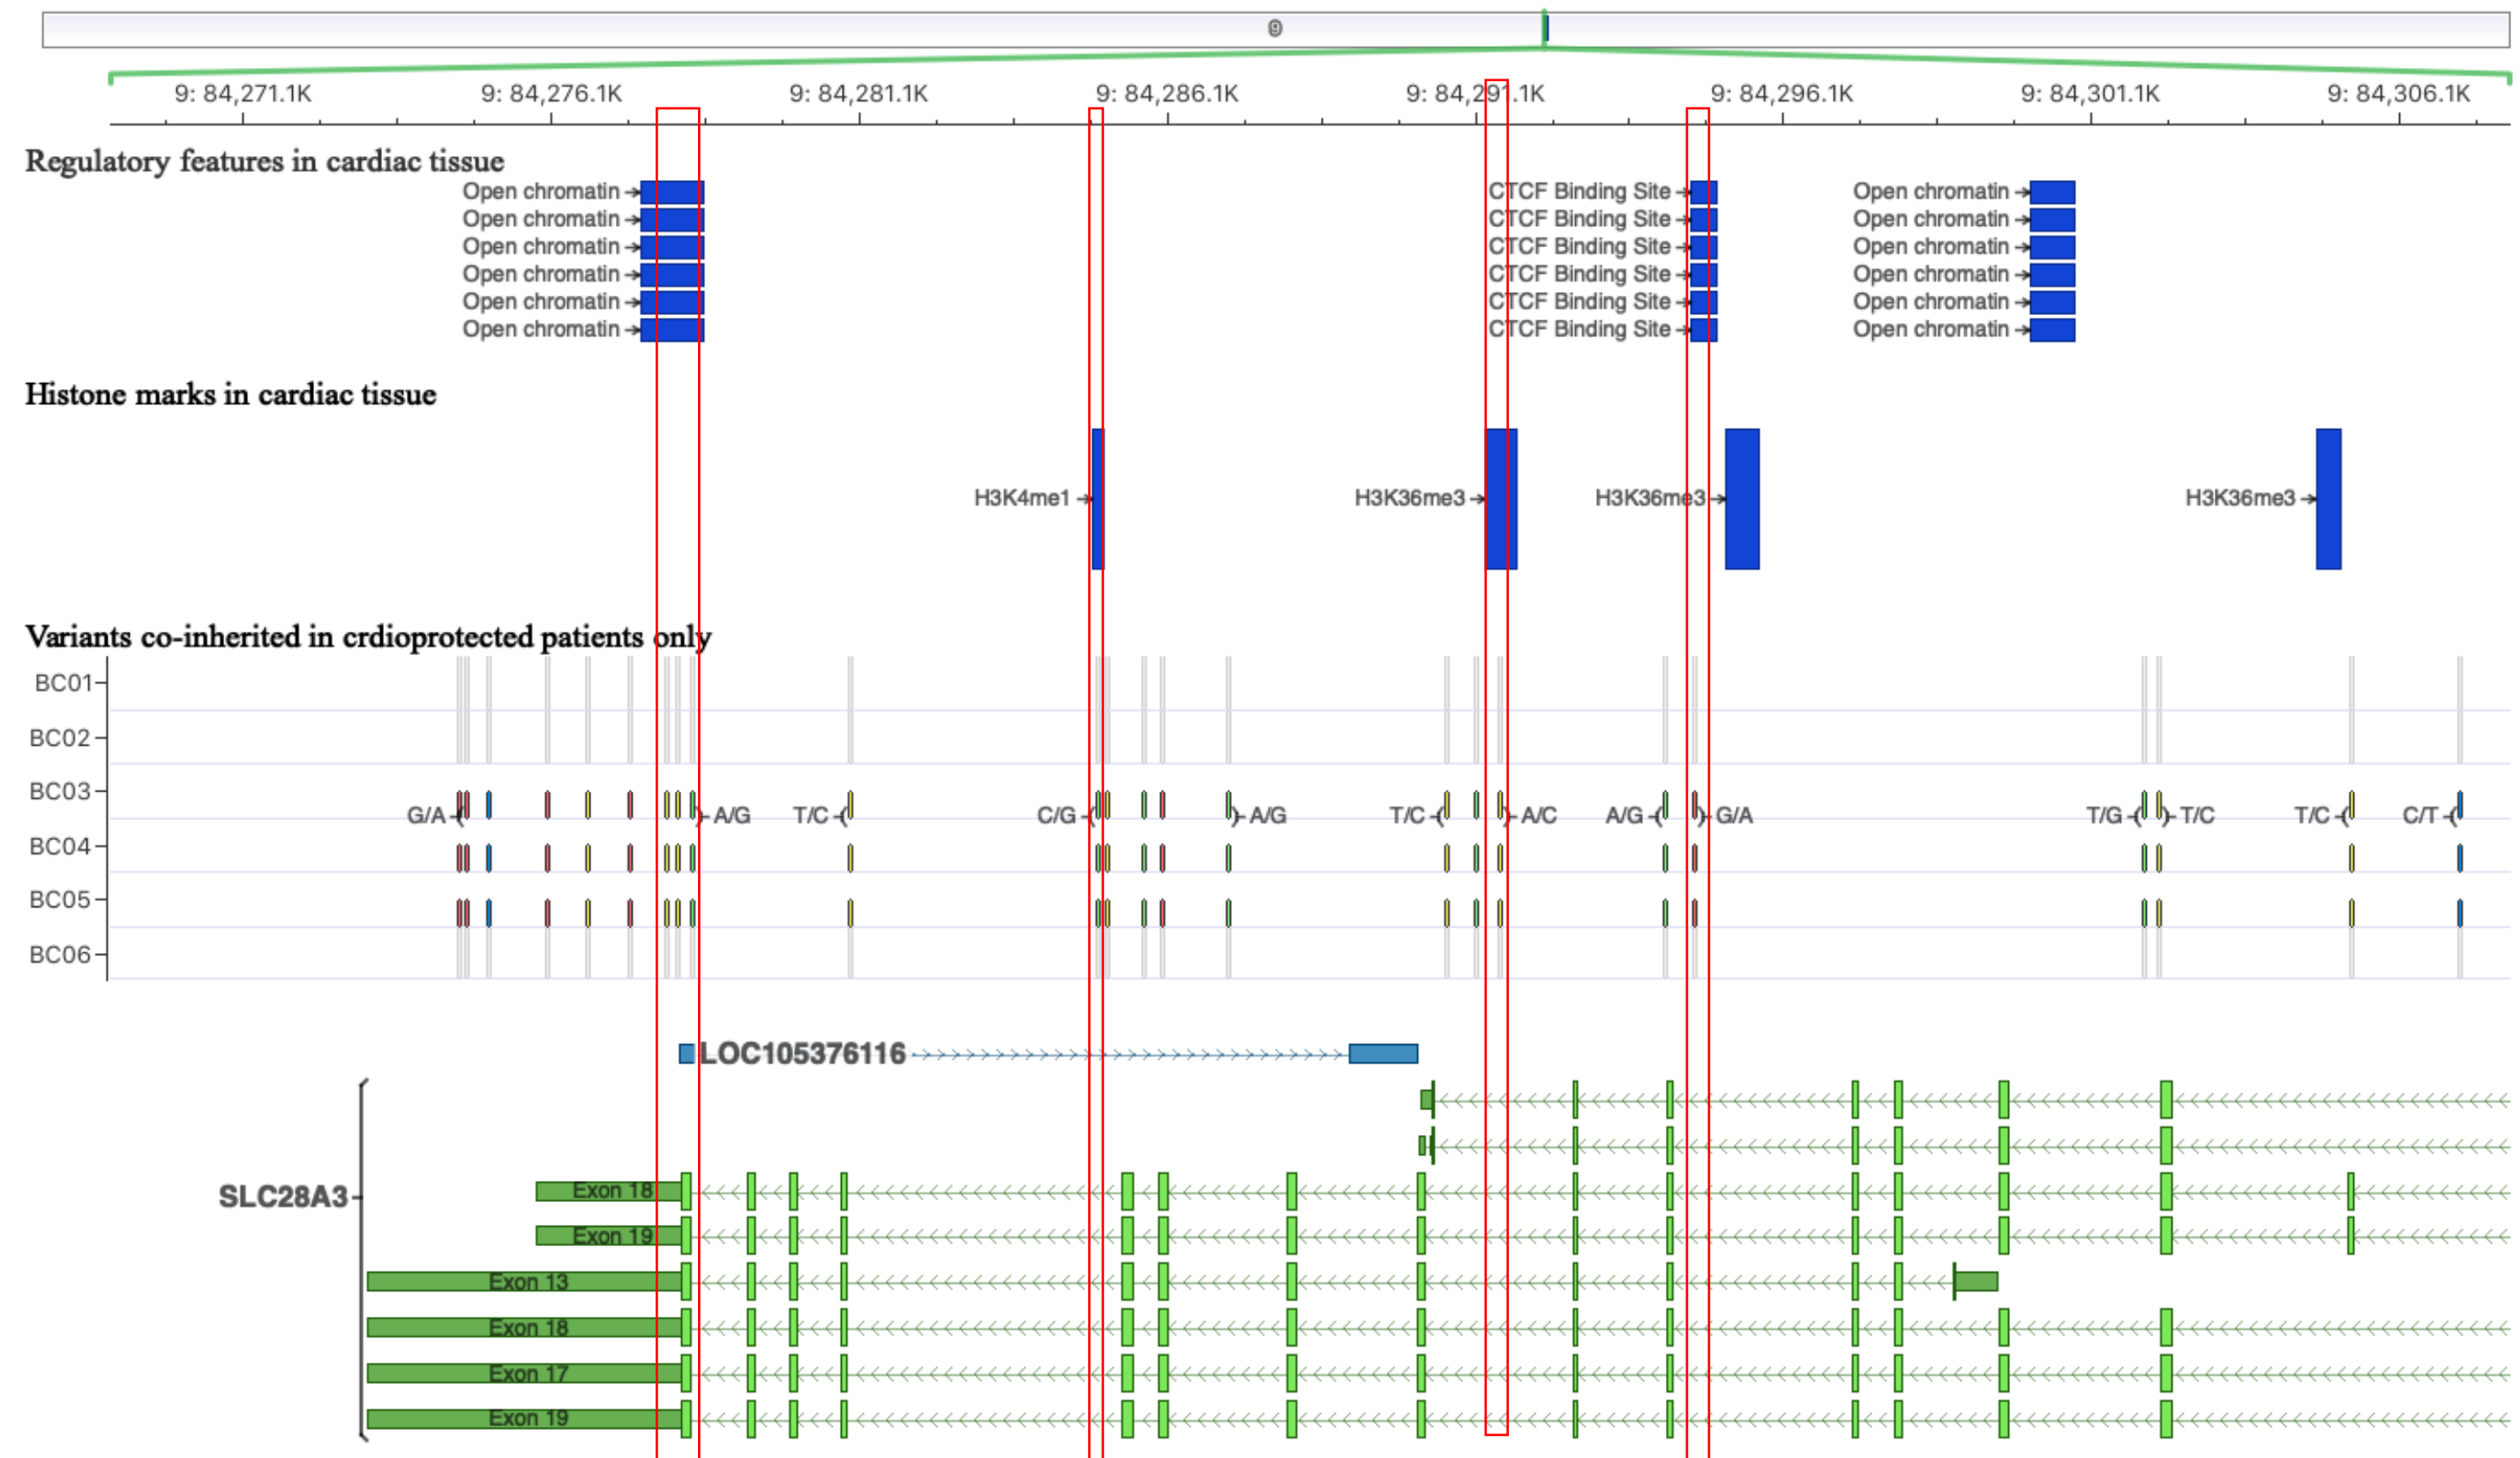

Figure S5

## Supplementary Figures legends

**Figure S1. Generation of *SLC28A3* amplicons, related to Figure 1.** (A) Exemplary agarose gel picture for all nine overlapping *SLC28A3* amplicons generated from one sample. L, ladder; 1-9, amplicons one to nine. (B) Exemplary pre-nanopore sequencing amplicon validation by sanger sequencing for amplicon number four (Amp04). Top panel shows the first ~ 600 bp of generated amplicon four (AMP04) aligned to its reference sequence (AMP04 ref). Bottom panel shows a zoom-in view for the first ~ 100 bp of generated amplicon four perfectly matching its reference sequence.

**Figure S2. Cumulative yield of demultiplexed sequence reads, related to Figure 1.** (A) Cumulative sequence yield in gigabase (GB) generated over 48 h. (B) Cumulative number of sequence reads generated over 48 h.

**Figure S3. Alignment of Nanopore sequence reads, related to Figure 1.** Dot plot showing reads percentage identity versus reads average base quality for each study sample. Histogram on the x-axis shows number of reads with relevant percentage identity. Histogram on the y-axis shows number of reads with relevant average base quality.

**Figure S4. Effect of candidate SNPs on chromatin features binding sites, related to Figure 3.** Effect of each SNP on altering chromatin features (transcription factors, DNase hypersensitive site, and histone marks) binding sites. Log<sub>2</sub> fold change measure the fold change in the probability of observing a binding site for relevant chromatin feature between reference and alternative allele for a particular SNP.

**Figure S5. Candidate SNPs located at regulatory regions in human cardiac tissue, related to Figure 3.** Regulatory regions assessed included transcription factors, histone mark, and DNase hypersensitive regions in human cardiac tissue integrated in ensemble regulatory build. SNPs marked by red rectangles are SNPs that are located in regulatory regions binding sites.

**Table S1. Inclusion and exclusion criteria, related to Figure 1.**

| Inclusion Criteria                                                                                                                                                                                     | Exclusion Criteria                                                        |
|--------------------------------------------------------------------------------------------------------------------------------------------------------------------------------------------------------|---------------------------------------------------------------------------|
| Diagnosis of cancer                                                                                                                                                                                    | Unwilling to consent/assent to $\leq 10$ ml blood draw                    |
| Treatment with doxorubicin (Adriamycin)                                                                                                                                                                |                                                                           |
| Age $\leq 18$ years at time treatment                                                                                                                                                                  |                                                                           |
| Documentation of pre-chemotherapy shortening fraction of $\geq 30\%$                                                                                                                                   | No documentation of pre-chemotherapy echocardiography shortening fraction |
| For affected patients only: SF of $\leq 24\%$ or signs and symptoms of cardiac compromise requiring intervention based on CTCAEv3. Only echos $\geq 21$ d after doxorubicin dose are to be considered. |                                                                           |
| For control patients: SF of $\geq 24\%$ and no symptoms of cardiac compromise for at least 5 years after treatment                                                                                     |                                                                           |

**Table S2. Doxorubicin-treated patients recruited in this study, related to Figure 1.**

| ID   | Anthracycline | Cardiotoxicity | Gender | Age at Treatment | Cancer diagnosis | Heart radiation | rs7853758 |
|------|---------------|----------------|--------|------------------|------------------|-----------------|-----------|
| BC01 | Yes           | Yes            | Male   | 5.1              | Wilm's Tumor     | Yes             | GG        |
| BC02 | Yes           | Yes            | Male   | 1.6              | ALL              | No              | GG        |
| BC06 | Yes           | Yes            | Female | 4.3              | ALL              | No              | GG        |
| BC03 | Yes           | No             | Female | 2.7              | ALL              | No              | AG        |
| BC04 | Yes           | No             | Female | 2.2              | ALL              | No              | AG        |
| BC05 | Yes           | No             | Male   | 1.6              | ALL              | No              | AG        |

Radiation therapy includes significant radiation exposure to the heart or surrounding tissue. This includes mantle and mediastinal radiation, whole-lung radiation, whole-abdomen or upper abdominal radiation, left-side flank radiation and total-body irradiation. SF, shortening fraction; NA, not applicable



**Table S3: primers for *SLC28A3* amplicons amplification, related to Figure 1.**

| Primer ID | Sequence 5'>3'         | Direction | Amplicon length (bp) |
|-----------|------------------------|-----------|----------------------|
| Amp01_fw  | AGTTGCATGTTGCCATTCTG   | Forward   | 9218                 |
| Amp01_rv  | GTTGCTGTAGCCCTCAGCTC   | Reverse   |                      |
| Amp02_fw  | CTCCCCAGGAGTGCAAATAG   | Forward   | 9908                 |
| Amp02_rv  | TCAAGGGAATCACTTCAGG    | Reverse   |                      |
| Amp03_fw  | TCAAGTTTGCATGATCACACC  | Forward   | 8979                 |
| Amp03_rv  | CAGGAAATATGGCTTCAGCTC  | Reverse   |                      |
| Amp04_fw  | AAGGAAGATCCCACGTTGTG   | Forward   | 9286                 |
| Amp04_rv  | AAGTGATGCTTCCCATCAGG   | Reverse   |                      |
| Amp05_fw  | GCTGTTTGTGAATCGGATG    | Forward   | 9306                 |
| Amp05_rv  | TCCAAGTGTCTGAGCACCAG   | Reverse   |                      |
| Amp06_fw  | TGTTGCAGGTGTTTGGAAAG   | Forward   | 5732                 |
| Amp06_rv  | ACATTATGAGCCACCGAAG    | Reverse   |                      |
| Amp07_fw  | CGGCCGCTGGTGAGGTCCCCAA | Forward   | 8668                 |
| Amp07_rv  | TGGCAGTGGTGCTGGCAAGCGT | Reverse   |                      |
| Amp08_fw  | TTGGCAATGTCCGGATTC     | Forward   | 9420                 |
| Amp08_rv  | TTCCCCTTCCAGGGATAAC    | Reverse   |                      |
| Amp09_fw  | GGACCTCTTCTCCCTGGAAC   | Forward   | 9509                 |
| Amp09_rv  | AGACCCTAAGGCCTCTCCAG   | Reverse   |                      |

**Table S4: PCR reaction mixture and conditions, related to Figure 1.**

| Amplicon ID                           | Composition of reaction mixture                                                                                                                                                                   | PCR condition                                                          |
|---------------------------------------|---------------------------------------------------------------------------------------------------------------------------------------------------------------------------------------------------|------------------------------------------------------------------------|
| Amp01, Amp02, Amp04, Amp05, and Amp09 | 10 µl 5X PrimeSTAR GXL Buffer, 4 µl dNTP Mixture (2.5 mM each), 1 µl of 100 µM primer, 300 ng DNA template, and 1 µl PrimeSTAR GXL DNA Polymerase 1.25 U/50, and Sterile distilled water to 50 µl | 30 cycles<br>98°C 10 sec<br>60°C 15 sec<br>68°C 10 min<br>Hold at 4 °C |
| Amp03, and Amp08                      | 10 µl 5X PrimeSTAR GXL Buffer, 4 µl dNTP Mixture (2.5 mM each), 1 µl of 100 µM primer, 300 ng DNA template, and 1 µl PrimeSTAR GXL DNA Polymerase 1.25 U/50, and Sterile distilled water to 50 µl | 30 cycles<br>98°C 10 sec<br>58°C 15 sec<br>68°C 10 min<br>Hold at 4 °C |
| Amp06                                 | 10 µl 5X PrimeSTAR GXL Buffer, 4 µl dNTP Mixture (2.5 mM each), 1 µl of 100 µM primer, 300 ng DNA template, and 1 µl PrimeSTAR GXL DNA Polymerase 1.25 U/50, and Sterile distilled water to 50 µl | 30 cycles<br>98°C 10 sec<br>60°C 15 sec<br>68°C 6 min<br>Hold at 4 °C  |
| Amp07                                 | 10 µl 5X PrimeSTAR GXL Buffer, 4 µl dNTP Mixture (2.5 mM each), 1 µl of 100 µM primer, 300 ng DNA template, and 1 µl PrimeSTAR GXL DNA Polymerase 1.25 U/50, and Sterile distilled water to 50 µl | 30 cycles<br>98°C 10 sec<br>66°C 15 sec<br>68°C 6 min<br>Hold at 4 °C  |

**Table S5: Quality assessment of *SLC28A3* amplicons, related to Figure 1.**

| Sample ID | Amplicon | Conc (ng/ul) | A260  | A280  | 260/280 | 260/230 |
|-----------|----------|--------------|-------|-------|---------|---------|
| BC01      | Amp01    | 117.2        | 2.344 | 1.232 | 1.9     | 1.72    |
|           | Amp02    | 7.525        | 0.15  | 0.095 | 1.58    | 1.69    |
|           | Amp03    | 74.43        | 1.489 | 0.771 | 1.93    | 1.73    |
|           | Amp04    | 48.37        | 0.967 | 0.514 | 1.88    | 2.08    |
|           | Amp05    | 128.3        | 2.566 | 1.342 | 1.91    | 1.94    |
|           | Amp06    | 59.79        | 1.196 | 0.649 | 1.84    | 1.62    |
|           | Amp07    | 90.3         | 1.806 | 0.971 | 1.86    | 1.69    |
|           | Amp08    | 7.217        | 0.144 | 0.074 | 1.95    | 1.52    |
|           | Amp09    | 146.8        | 2.936 | 1.546 | 1.9     | 2.13    |
| BC02      | Amp01    | 148.3        | 2.967 | 1.57  | 1.89    | 2.14    |
|           | Amp02    | 80.62        | 1.612 | 0.88  | 1.83    | 1.72    |
|           | Amp03    | 51.97        | 1.039 | 0.549 | 1.89    | 1.75    |
|           | Amp04    | 107.7        | 2.154 | 1.142 | 1.89    | 1.96    |
|           | Amp05    | 98.96        | 1.979 | 1.06  | 1.87    | 1.95    |
|           | Amp06    | 122.6        | 2.453 | 1.288 | 1.9     | 1.94    |
|           | Amp07    | 103.4        | 2.069 | 1.123 | 1.84    | 1.88    |
|           | Amp08    | 19.44        | 0.389 | 0.217 | 1.79    | 2.04    |
|           | Amp09    | 81.35        | 1.627 | 0.855 | 1.9     | 2.02    |
| BC06      | Amp01    | 96.78        | 1.936 | 1.016 | 1.91    | 2.09    |
|           | Amp02    | 60.44        | 1.209 | 0.672 | 1.8     | 1.57    |
|           | Amp03    | 73.76        | 1.475 | 0.796 | 1.85    | 1.72    |
|           | Amp04    | 134.1        | 2.681 | 1.424 | 1.88    | 2.07    |
|           | Amp05    | 84.22        | 1.684 | 0.887 | 1.9     | 1.92    |
|           | Amp06    | 41.24        | 0.825 | 0.439 | 1.88    | 1.86    |
|           | Amp07    | 104.5        | 2.089 | 1.095 | 1.91    | 2.11    |
|           | Amp08    | 45.57        | 0.911 | 0.496 | 1.84    | 1.79    |
|           | Amp09    | 73.19        | 1.464 | 0.81  | 1.81    | 1.67    |
| BC03      | Amp01    | 120.1        | 2.403 | 1.284 | 1.87    | 2.07    |
|           | Amp02    | 40.18        | 0.804 | 0.449 | 1.79    | 1.61    |
|           | Amp03    | 58.98        | 1.18  | 0.631 | 1.87    | 1.8     |
|           | Amp04    | 91.2         | 1.824 | 0.973 | 1.87    | 1.92    |
|           | Amp05    | 114.6        | 2.293 | 1.241 | 1.85    | 1.72    |
|           | Amp06    | 93.09        | 1.862 | 0.979 | 1.9     | 2.01    |
|           | Amp07    | 106.4        | 2.128 | 1.11  | 1.92    | 1.77    |
|           | Amp08    | 64.44        | 1.289 | 0.711 | 1.81    | 1.91    |
|           | Amp09    | 61.63        | 1.233 | 0.651 | 1.89    | 2.08    |
| BC04      | Amp01    | 147          | 2.94  | 1.551 | 1.9     | 1.79    |
|           | Amp02    | 38.41        | 0.768 | 0.405 | 1.9     | 1.78    |
|           | Amp03    | 35.4         | 0.708 | 0.387 | 1.83    | 1.56    |
|           | Amp04    | 155.2        | 3.105 | 1.664 | 1.87    | 1.91    |
|           | Amp05    | 101.4        | 2.028 | 1.045 | 1.94    | 1.98    |
|           | Amp06    | 46.66        | 0.933 | 0.494 | 1.89    | 1.88    |
|           | Amp07    | 82.67        | 1.653 | 0.911 | 1.81    | 1.9     |
|           | Amp08    | 14.07        | 0.281 | 0.15  | 1.88    | 1.81    |
|           | Amp09    | 61.4         | 1.228 | 0.663 | 1.85    | 2.11    |
| BC05      | Amp01    | 72.96        | 1.459 | 0.771 | 1.89    | 1.72    |
|           | Amp02    | 116.3        | 2.327 | 1.246 | 1.87    | 2.13    |

|  |       |       |       |       |      |      |
|--|-------|-------|-------|-------|------|------|
|  | Amp03 | 125.4 | 2.509 | 1.312 | 1.91 | 2.2  |
|  | Amp04 | 59.99 | 1.2   | 0.644 | 1.86 | 1.55 |
|  | Amp05 | 33.31 | 0.666 | 0.353 | 1.89 | 1.79 |
|  | Amp06 | 141.3 | 2.826 | 1.515 | 1.87 | 1.73 |
|  | Amp07 | 27.08 | 0.542 | 0.295 | 1.84 | 1.59 |
|  | Amp08 | 41.91 | 0.838 | 0.44  | 1.91 | 1.72 |
|  | Amp09 | 90.51 | 1.81  | 0.978 | 1.85 | 1.83 |

**Table S7: Genotype concordance between Nanopore sequencing and genotyping on InfiniumOmniExpress-24v1-2, related to Figure 2.**

| Type      | Count | Percent of total |
|-----------|-------|------------------|
| REF/REF   | 421   | 74.78            |
| REF/ALT1  | 0     | 0.00             |
| REF/ALT2  | 0     | 0.00             |
| ALT1/REF  | 46    | 8.17             |
| ALT1/ALT1 | 74    | 13.14            |
| ALT1/ALT2 | 0     | 0.00             |
| ALT2/REF  | 3     | 0.53             |
| ALT2/ALT1 | 0     | 0.00             |
| ALT2/ALT2 | 19    | 3.37             |
| Total     | 563   | 100.00           |

The genotypes are: homozygous reference (REF), heterozygous (ALT1), and homozygous non-reference (ALT2). The pairs of genotypes, e.g., REF/REF, on each row represent genotype calls by nanopore sequence and by the Omni chip respectively. REF/REF, ALT1/ALT1, and ALT2/ALT2 indicate concordant genotypes. Line graph represents genotype percentage of total

**Table S8: Regulatory properties of *SLC28A3* SNPs coinherited only in cardio protected patients, related to Figure 3.**

| <b>rs ID</b> | <b>No. of altered chromatin feature binding sites</b> |
|--------------|-------------------------------------------------------|
| rs11140490   | 206                                                   |
| rs4877835    | 204                                                   |
| rs4877836    | 141                                                   |
| rs7867504    | 134                                                   |
| rs4877272    | 107                                                   |
| rs885004     | 105                                                   |
| rs12237803   | 52                                                    |
| rs3750406    | 41                                                    |
| rs12003403   | 40                                                    |
| rs10868135   | 33                                                    |
| rs4877831    | 32                                                    |
| rs4877833    | 31                                                    |
| rs10868137   | 30                                                    |
| rs7853758    | 11                                                    |
| rs7858075    | 6                                                     |
| rs7047315    | 4                                                     |
| rs7853066    | 4                                                     |
| rs7030019    | 3                                                     |
| rs12003423   | 2                                                     |
| rs7047898    | 2                                                     |
| rs11140488   | 1                                                     |
| rs4877834    | 1                                                     |

**Table S9: *SLC28A3* SNPs coinherited only in cardio protected patient affecting chromatin feature binding sites (showing only SNPs with Log2 fold change value  $\geq 1$ ), related to Figure 3.**

| rs ID     | Cell type  chromatin  treatment       | E-value | Log2 fold change |
|-----------|---------------------------------------|---------|------------------|
| rs4877272 | ECC-1 ERalpha BPA_100nM               | 0.01    | -1.01            |
|           | H1-hESC TEAD4 None                    | 0.01    | -1.60            |
|           | NT2-D1 DNase None                     | 0.03    | -1.22            |
|           | NHEK DNase None                       | 0.03    | -1.01            |
|           | H7-hESC DNase None                    | 0.03    | -1.22            |
|           | H1-hESC DNase None                    | 0.04    | -1.22            |
|           | RWPE1 DNase None                      | 0.05    | -1.09            |
| rs7867504 | GM12878 JunD None                     | 0.00    | -1.11            |
|           | PrEC DNase None                       | 0.01    | -1.55            |
|           | GM12878 BATF None                     | 0.01    | -1.34            |
|           | GM12865 DNase None                    | 0.01    | -1.04            |
|           | GM12864 DNase None                    | 0.01    | -1.00            |
|           | SAEC DNase None                       | 0.01    | -1.62            |
|           | HMEC DNase None                       | 0.01    | -1.12            |
|           | HEEpiC DNase None                     | 0.01    | -1.52            |
|           | pHTE DNase None                       | 0.01    | -1.06            |
|           | NHEK DNase None                       | 0.01    | -1.17            |
|           | HRCEpiC DNase None                    | 0.02    | -1.18            |
|           | HRE DNase None                        | 0.02    | -1.21            |
|           | HPDE6-E6E7 DNase None                 | 0.02    | -1.22            |
|           | MCF10A-Er-Src STAT3 4OHTAM_1uM_12hr   | 0.02    | -1.30            |
|           | MCF10A-Er-Src STAT3 EtOH_0.01pct_12hr | 0.02    | -1.25            |
|           | MCF10A-Er-Src c-Fos 4OHTAM_1uM_12hr   | 0.02    | -1.81            |
|           | MCF10A-Er-Src c-Myc 4OHTAM_1uM_4hr    | 0.02    | -1.06            |
|           | MCF10A-Er-Src STAT3 EtOH_0.01pct_4hr  | 0.02    | -1.18            |
|           | MCF10A-Er-Src STAT3 4OHTAM_1uM_36hr   | 0.02    | -1.21            |
|           | MCF10A-Er-Src STAT3 EtOH_0.01pct      | 0.02    | -1.00            |

|            |                                     |      |       |
|------------|-------------------------------------|------|-------|
|            | MCF10A-Er-Src c-Fos 4OHTAM_1uM_4hr  | 0.02 | -1.67 |
|            | RWPE1 DNase None                    | 0.02 | -1.17 |
|            | HUVEC c-Fos None                    | 0.03 | -1.09 |
|            | MCF10A-Er-Src c-Fos EtOH_0.01pct    | 0.03 | -1.66 |
|            | MCF10A-Er-Src c-Fos 4OHTAM_1uM_36hr | 0.03 | -1.82 |
|            | HMVEC-dBl-Ad DNase None             | 0.03 | -1.13 |
|            | RPTEC DNase None                    | 0.03 | -1.01 |
|            | HMVEC-dLy-Neo DNase None            | 0.03 | -1.02 |
|            | WI-38 DNase 4OHTAM_20nM_72hr        | 0.04 | -1.28 |
|            | HMVEC-LB1 DNase None                | 0.04 | -1.18 |
|            | HUVEC c-Jun None                    | 0.04 | -1.01 |
|            | HFF-Myc DNase None                  | 0.05 | -1.03 |
|            | NHLF DNase None                     | 0.05 | -1.16 |
| rs11140490 | Melano DNase None                   | 0.00 | 1.05  |
|            | HSMM_emb DNase None                 | 0.00 | 1.22  |
|            | HSMMtube DNase None                 | 0.00 | 1.42  |
|            | NHDF-neo DNase None                 | 0.00 | 1.76  |
|            | NHDF-Ad DNase None                  | 0.00 | 1.73  |
|            | AG10803 DNase None                  | 0.00 | 1.56  |
|            | ProgFib DNase None                  | 0.00 | 1.34  |
|            | FibroP DNase None                   | 0.00 | 1.25  |
|            | HGF DNase None                      | 0.00 | 1.56  |
|            | HPdLF DNase None                    | 0.00 | 1.58  |
|            | Stellate DNase None                 | 0.00 | 1.36  |
|            | HCF DNase None                      | 0.00 | 1.42  |
|            | AG09319 DNase None                  | 0.00 | 1.46  |
|            | HSMM DNase None                     | 0.00 | 1.36  |
|            | SK-N-SH TAF1 None                   | 0.00 | 1.07  |
|            | HFF DNase None                      | 0.00 | 1.35  |
|            | BJ DNase None                       | 0.00 | 1.42  |
|            | HCM DNase None                      | 0.00 | 1.42  |

|            |                              |      |      |
|------------|------------------------------|------|------|
|            | AG09309 DNase None           | 0.00 | 1.45 |
|            | Myometr DNase None           | 0.00 | 1.16 |
|            | AG04449 DNase None           | 0.00 | 1.37 |
|            | HPF DNase None               | 0.00 | 1.51 |
|            | AoAF DNase None              | 0.00 | 1.36 |
|            | AoSMC DNase None             | 0.00 | 1.40 |
|            | SKMC DNase None              | 0.00 | 1.29 |
|            | PanIsletD DNase None         | 0.00 | 1.18 |
|            | HMF DNase None               | 0.00 | 1.42 |
|            | HPAF DNase None              | 0.00 | 1.31 |
|            | HConF DNase None             | 0.00 | 1.37 |
|            | HAc DNase None               | 0.00 | 1.07 |
|            | HFF-Myc DNase None           | 0.00 | 1.08 |
|            | HBMEC DNase None             | 0.00 | 1.29 |
|            | WI-38 DNase 4OHTAM_20nM_72hr | 0.00 | 1.17 |
|            | NH-A DNase None              | 0.01 | 1.16 |
|            | WI-38 DNase None             | 0.01 | 1.25 |
|            | NHLF DNase None              | 0.01 | 1.15 |
|            | AG04450 DNase None           | 0.01 | 1.21 |
|            | HCFAa DNase None             | 0.01 | 1.13 |
|            | HNPCEpiC DNase None          | 0.01 | 1.16 |
|            | HVMF DNase None              | 0.01 | 1.26 |
|            | HCPEpiC DNase None           | 0.01 | 1.05 |
|            | HIPEpiC DNase None           | 0.01 | 1.06 |
|            | HAepiC DNase None            | 0.01 | 1.10 |
| rs4877835  | NHDF-Ad DNase None           | 0.01 | 1.07 |
|            | NHDF-neo DNase None          | 0.01 | 1.06 |
|            | BE2_C DNase None             | 0.01 | 1.08 |
|            | SK-N-SH_RA DNase None        | 0.01 | 1.08 |
| rs10868137 | H1-hESC TCF12 None           | 0.00 | 1.07 |
|            | GM12878 ZEB1 None            | 0.00 | 1.06 |



E-value, expect value stands for the significance of each individual chromatin feature predicted score; Log2 fold change, measure the fold change in the probability of observing a binding site for relevant chromatin feature between reference and alternative allele for a particular SNP (Zhou and Troyanskaya, 2015).

**Table S10: *SLC28A3* SNPs coinherited only in cardio protected patient located at regulatory regions and histone marks in cardiac tissues, and at transcription factor binding sites using ensemble regulatory build, related to Figure 3.**

| SNPs       | Position | Histone marks in cardiac tissue | Regulatory region in cardiac tissue | Motifs present at SNP locus                                                                                                                                                                                                                                                                                                                                                                  |
|------------|----------|---------------------------------|-------------------------------------|----------------------------------------------------------------------------------------------------------------------------------------------------------------------------------------------------------------------------------------------------------------------------------------------------------------------------------------------------------------------------------------------|
| rs3750406  | 84277979 | —                               | Open chromatin                      | TEAD4::RFX5, FOXJ3::TBX21, SOX6::TBX21, ELK1::FOXI1, ETV2::FOXI1, MGA, TBX2, TBX4, TBX5, ONECUT1, ONECUT2, ONECUT3, HOXB2::EOMES, HOXB2::TBX21, HOXB2::TBX3, MGA::DLX2, MGA::DLX3, MGA::EVX1, PITX1::HES7, E2F3::ONECUT2, TFAP2C::ONECUT2, ETV2::SREBF2, CUX1::SOX15, HOXB13::EOMES, HOXB13::TBX21, HOXD12::TBX21, TBX20, KLF13, KLF14, SREBF2, GLIS1, EOMES, SNAI2, TCF3, TCF4, THRB (n=36) |
| rs7858075  | 84278156 | —                               | Open chromatin                      | TEAD4::FOXI1, IRF3, ETV2::SOX15, POU2F1::FOXO6, POU2F1::DLX2, TEAD4::FOXI1 (n=6)                                                                                                                                                                                                                                                                                                             |
| rs11140490 | 84278398 | —                               | Open chromatin                      | CLOCK::FIGLA, TEAD4::EOMES, TEAD4::TBX21, ETV2::DRGX, ZIC1, ZIC3, ZIC4, HOXB2::NHLH1, TEAD4::TCF3, GCM2::SOX15, and TEAD4::FIGLA (n=11)                                                                                                                                                                                                                                                      |
| rs4877831  | 84284969 | H3K4me1                         | —                                   | —                                                                                                                                                                                                                                                                                                                                                                                            |
| rs7047898  | 84291502 | H3K36me3                        | —                                   | —                                                                                                                                                                                                                                                                                                                                                                                            |
| rs10868137 | 84294167 | —                               | —                                   | TFAP2C::DLX3, FOXO1::HOXB13, MGA::DLX3, HOXB2::TCF3 (n=4)                                                                                                                                                                                                                                                                                                                                    |
| rs885004   | 84294635 | —                               | CTCF binding site                   | THRB, TEAD4::CEBPD, ERF::PITX1, ETV2::GSC2, ERF::ONECUT2, ETV2::ONECUT2, FLI1::ONECUT2, POU2F1::DLX2, R, X3::SRF, TEAD4::PAX5, PITX1::HES7, HESX1, LHX9, HOXD12::HOXA3, ZBED1, BARHL2, E2F1, E2F2, E2F3, BARX1, MSX1, MSX2, TBX1, TBX20, HOXB13::EOMES, HOXB13::TBX21, TEAD4::HOXB13, PBX4::HOXA1, PBX4::HOXA10, ONECUT1, ONECUT2, HMX1, HMX2, HMX3, CUX1::SOX15, TFAP2C::ONECUT2 (n=36)     |
| rs4877835  | 84301936 | —                               | —                                   | POU2F1::FOXO6, POU2F1::EOMES, CLOCK::BHLHA15, MAX, TFAP4::MAX, HOXD12::EOMES, FOXO1, FOXO3, FOXO4, FOXO6, CTCF, ZNF238, ASCL2, BHLHA15, BHLHE22, BHLHE23, MESP2, MSC, MYF6, NEUROD2, NEUROG2, NHLH1, OLIG1, OLIG2, OLIG3, TCF15, TFAP4, ESRR, ESRRG, FOXJ2::HOXB13 (n=30)                                                                                                                    |
| rs4877836  | 84302173 | —                               | —                                   | MYBL1, MYBL2, IRF4, IRF5, IRF8, IRF9, ELK1::FOXI1, ERF::FOXI1, ETV2::FOXI1, ETV5::FOXI1, FLI1::FOXI1, FOXO1::ELF1, FOXO1::ELK1, ELK1::HOXA3 (n=14)                                                                                                                                                                                                                                           |

**Table S11: eQTL (expression quantitative trait loci) functional annotation of *SLC28A3* SNPs coinherited only in cardio protected patients, related to Figure 3.**

| SNP Id     | <i>P</i> -value | NES   | Tissue                       |
|------------|-----------------|-------|------------------------------|
| rs10868133 | 2.10E-07        | -0.22 | Cells - Cultured fibroblasts |
|            | 4.50E-07        | 0.21  | Thyroid                      |
| rs10868135 | 4.10E-07        | -0.22 | Cells - Cultured fibroblasts |
|            | 0.0000034       | 0.2   | Thyroid                      |
| rs10868137 | 3.80E-07        | 0.23  | Thyroid                      |
|            | 6.70E-07        | -0.22 | Cells - Cultured fibroblasts |
| rs11140488 | 1.60E-07        | -0.22 | Cells - Cultured fibroblasts |
|            | 2.60E-07        | 0.22  | Thyroid                      |
| rs11140489 | 1.50E-07        | -0.22 | Cells - Cultured fibroblasts |
|            | 4.20E-07        | 0.21  | Thyroid                      |
| rs11140490 | 1.40E-07        | -0.22 | Cells - Cultured fibroblasts |
|            | 6.30E-07        | 0.21  | Thyroid                      |
| rs12003403 | 1.60E-07        | -0.22 | Cells - Cultured fibroblasts |
|            | 2.60E-07        | 0.22  | Thyroid                      |
| rs12003423 | 1.60E-07        | -0.22 | Cells - Cultured fibroblasts |
|            | 7.20E-07        | 0.21  | Thyroid                      |
| rs12237803 | 4.70E-08        | -0.24 | Cells - Cultured fibroblasts |
|            | 7.50E-08        | 0.24  | Thyroid                      |
| rs3750406  | 1.40E-07        | -0.22 | Cells - Cultured fibroblasts |
|            | 6.30E-07        | 0.21  | Thyroid                      |
| rs4877272  | 6.40E-08        | -0.23 | Cells - Cultured fibroblasts |
|            | 5.60E-07        | 0.21  | Thyroid                      |
| rs4877831  | 6.00E-09        | -0.21 | Cells - Cultured fibroblasts |
|            | 0.000021        | 0.16  | Thyroid                      |
| rs4877833  | 5.30E-07        | -0.21 | Cells - Cultured fibroblasts |
|            | 8.90E-07        | 0.21  | Thyroid                      |
| rs4877834  | 4.70E-08        | 0.24  | Thyroid                      |
|            | 7.40E-07        | -0.21 | Cells - Cultured fibroblasts |
| rs4877835  | 4.20E-07        | 0.23  | Thyroid                      |
|            | 5.20E-07        | -0.22 | Cells - Cultured fibroblasts |
| rs4877836  | 3.10E-07        | -0.23 | Cells - Cultured fibroblasts |
|            | 3.30E-07        | 0.23  | Thyroid                      |
| rs7030019  | 1.70E-08        | 0.25  | Thyroid                      |
|            | 8.70E-08        | -0.23 | Cells - Cultured fibroblasts |
|            | 0.000014        | 0.64  | Brain - Amygdala             |

|           |           |       |                              |
|-----------|-----------|-------|------------------------------|
| rs7047315 | 3.80E-07  | 0.23  | Thyroid                      |
|           | 6.70E-07  | -0.22 | Cells - Cultured fibroblasts |
| rs7047898 | 3.80E-07  | 0.23  | Thyroid                      |
|           | 6.70E-07  | -0.22 | Cells - Cultured fibroblasts |
| rs7853066 | 1.50E-07  | 0.23  | Thyroid                      |
|           | 7.00E-07  | -0.21 | Cells - Cultured fibroblasts |
| rs7853758 | 3.10E-08  | 0.23  | Thyroid                      |
|           | 0.0000019 | -0.2  | Cells - Cultured fibroblasts |
|           | 0.000014  | 0.61  | Brain - Amygdala             |
| rs7867504 | 0.000003  | -0.16 | Cells - Cultured fibroblasts |
| rs885004  | 1.30E-07  | -0.23 | Cells - Cultured fibroblasts |
|           | 1.90E-07  | 0.23  | Thyroid                      |

NES, normalized effect size; This analysis was done using GTEX eQTL database

**Table S12: Quality Control of Genotype Imputation, related to Figure 4.**

| <b>Posterior probability intervals</b> | <b>Number of Genotypes</b> | <b>% Concordance</b> | <b>Posterior probability intervals</b> | <b>% Called</b> | <b>% Concordance</b> |
|----------------------------------------|----------------------------|----------------------|----------------------------------------|-----------------|----------------------|
| [0.0-0.1]                              | 0                          | 0                    | [>= 0.0]                               | 100             | 95.7                 |
| [0.1-0.2]                              | 0                          | 0                    | [>= 0.1]                               | 100             | 95.7                 |
| [0.2-0.3]                              | 0                          | 0                    | [>= 0.2]                               | 100             | 95.7                 |
| [0.3-0.4]                              | 0                          | 0                    | [>= 0.3]                               | 100             | 95.7                 |
| [0.4-0.5]                              | 1                          | 0                    | [>= 0.4]                               | 100             | 95.7                 |
| [0.5-0.6]                              | 0                          | 0                    | [>= 0.5]                               | 99.8            | 96.4                 |
| [0.6-0.7]                              | 0                          | 0                    | [>= 0.6]                               | 99.8            | 96.4                 |
| [0.7-0.8]                              | 3                          | 0                    | [>= 0.7]                               | 99.8            | 96.4                 |
| [0.8-0.9]                              | 4                          | 100                  | [>= 0.8]                               | 99.8            | 97.8                 |
| [0.9-1.0]                              | 130                        | 100                  | [>= 0.9]                               | 99.5            | 98.5                 |

**Table S14: Cost estimates of Nanopore candidate loci sequencing compared to Illumina targeted sequencing, , related to Figure 4.**

| Steps                         | Cost per ~100kb / sample in USD |                   |                   |                   |                              |                    |                    |                    |
|-------------------------------|---------------------------------|-------------------|-------------------|-------------------|------------------------------|--------------------|--------------------|--------------------|
|                               | Nanopore MinION Sequencing      |                   |                   |                   | Illumina Targeted Sequencing |                    |                    |                    |
| Number of multiplexed samples | <i>n</i> = 6                    | <i>n</i> = 12     | <i>n</i> = 24     | <i>n</i> = 96     | <i>n</i> = 6                 | <i>n</i> = 12      | <i>n</i> = 24      | <i>n</i> = 96      |
| Library preparation           | 16.6 <sup>a</sup>               | 8.33 <sup>a</sup> | 4.16 <sup>a</sup> | 1.04 <sup>a</sup> | 35.83 <sup>b</sup>           | 35.83 <sup>b</sup> | 35.83 <sup>b</sup> | 35.83 <sup>b</sup> |
| Samples barcoding             | 4 <sup>c</sup>                  | 4 <sup>c</sup>    | 4 <sup>c</sup>    | 1.77 <sup>c</sup> | 7 <sup>d</sup>               | 7 <sup>d</sup>     | 7 <sup>d</sup>     | 7 <sup>d</sup>     |
| Sequencing                    | 5.20 <sup>e</sup>               | 5.20 <sup>e</sup> | 5.20 <sup>e</sup> | 5.20 <sup>e</sup> | 160 <sup>f</sup>             | 80 <sup>f</sup>    | 40 <sup>f</sup>    | 10 <sup>f</sup>    |
| <b>Total cost</b>             | <b>25.8</b>                     | <b>17.54</b>      | <b>13.37</b>      | <b>8.02</b>       | <b>313.67</b>                | <b>178.25</b>      | <b>110.54</b>      | <b>57.99</b>       |

<sup>a</sup>Library preparation using SQK-LSK109 kit. <sup>b</sup>Library preparation using Nextera XT DNA Library Preparation Kit. <sup>c</sup> Sample barcoding using EXP-NBD104 or EXP-NBD 114 or EXP-PBC096 kits. <sup>d</sup> Sample barcoding using Illumina Nextera DNA Unique Indexes. <sup>e</sup>Sequencing using Nanopore MinION (1 flow cell). Unlike Miseq, real-time data analysis provides the privilege of controlling the utilization of the Minion flow cell. Once sufficient coverage is reached, the sequencing is stopped, flow cell is washed and stored until the next experiment. <sup>f</sup>Sequencing using Miseq 600-cycle (one flow cell). The cost of the devices and kits are adopted from <https://nanoporetech.com/products/comparison> and <https://www.illumina.com/products.html>

## Transparent Methods

### **Patient recruitment and hiPSC-CM generation.**

SNP rs7853758 is associated with cardioprotective effect after doxorubicin treatment in a Canadian pediatric patient population, and has been validated in both Dutch and US patient populations (Aminkeng et al., 2015). With written consent, six well-phenotyped, doxorubicin-exposed patients from the Canadian cohort were specifically re-recruited according to the original inclusion criteria (**Table S1 and S2**). This study was approved by the individual ethics committees or institutional review boards of the universities and institutions where patients were enrolled. Written informed consent or assent was obtained from patients or their parents or legal guardians in accordance with the Declaration of Helsinki as revised in 2008. Peripheral blood was drawn from three pediatric patients who carried a heterozygous SNP and were protected from doxorubicin-induced cardiotoxicity (BC03, BC04, and BC05), and three control patients who did not carry this protective SNP and developed cardiotoxicity upon same doxorubicin therapy (BC01, BC02, and BC06). Detailed patient demographics and phenotype, including age, sex, ethnicity, type of cancer, treatment regime and cardiovascular function, are all well documented (Visscher et al., 2012, Visscher et al., 2013). Genomically stable hiPSC lines from each individual have been established after non-integrating (Sendai virus-based) reprogramming (Burridge et al., 2016, Burridge et al., 2015).

### **DNA extraction and purification.**

DNA was isolated from six patients derived human induced pluripotent stem cells, using QuickExtract DNA Extraction Solution (Epicenter) according to manufacturer protocol. Isolated DNA was then purified using Genomic DNA Clean & Concentrator-10 (Zymo research) according to manufacturer protocol.

### ***SLC28A3* locus amplification and amplicons validation.**

About 75 kb located on chr9: 84,274,029-84,349,802 (NC\_000009.12, GRCh38.p7) encompassing the coding region of *SLC28A3* gene (chr9: 84,340,634-84,278,218) plus 9 kb and 5 kb at the 5'UTR and 3'UTR, respectively were amplified using long range PCR. A set of primer pairs were designed to amplify nine overlapping amplicons covering the target region whereas, the

length of amplicons ranged between 5732 and 9908 bp (**Table S3**). Generation of overlapping amplicons help compensate for the low depth of coverage at the start and the end of each sequence read. Using ~200 ng of DNA per reaction, amplicons were amplified using PrimeSTAR GXL DNA Polymerase (Takara) via three steps-PCR. PCR conditions were optimized for each amplicon to avoid any unspecific amplification. PCR reaction mixture components and cycling conditions are mentioned in **Table S4**. Amplified amplicons were then purified using PureLink PCR Purification Combo Kit (Thermo Scientific) to get rid of contaminants that could damage the pores of the Nanopore flow cell, and eventually decrease the number of the sequencing reads.

### **Amplicon validation prior sequencing**

PCR products (amplicons) were run on 1% agarose gel and visualized by staining with GelGreen Nucleic Acid Stain (Biotium) (**Figure S1A**). Gel bands corresponding to target amplicons size were confirmed for all amplified amplicons. For further confirmation, ~ 1 kb at the start and the end of each purified amplicon were then Sanger sequenced, and *in silico* aligned to its relevant reference sequence (**Figure S1B**). The quality and concentration of the generated amplicons were assessed using NanoDrop 8000 and Qubit 3.0 fluorometer, respectively (**Table S5**). It is important to generate amplicons with reasonable purity to avoid ruining the pores of the flow cell which decreases the number of generated sequence reads. Thus, amplicons with 260/280 and 260/230 absorbance ratios of less than 1.8 and 1.5, respectively were excluded and regenerated.

### **MinION library preparation and flow cell loading**

Library preparation was done using ligation sequencing (Oxford, Nanopore, SQK-LSK108) and 1D Native barcoding (Oxford, Nanopore, EXP-NBD103) kits. All amplicons were pooled together in an equimolar amount and repaired using NEBNext End repair / dA-tailing Module (New England Biolabs, E7546). Reaction mix was prepared by adding 45 µl eluted DNA to 7 µl Ultra II End-prep reaction buffer, 10 µl Ultra II End-prep enzyme mix, and 5 µl nuclease-free water. Reaction mix was then incubated for 5 min at 20 °C followed by 5 min at 65 °C. DNA was then purified using AMPure XP beads (see above). Finally, 25 µl clear elute was transferred into DNA LoBind tube.

Each sample was then barcoded using 1D Native barcoding (Oxford, Nanopore, EXP-NBD103), by adding 2.5 µl native Barcode to 22.5 µl end-prepped DNA, and 25 µl Blunt/TA



Ligase Master Mix (New England Biolabs, M0367). Reaction mix was then incubated for 10 min at room temperature, DNA was then purified using AMPure XP beads (see above), and 26  $\mu$ l of clear elute was transferred into Eppendorf DNA LoBind tube.

Barcoded samples were pooled in an equimolar amount to a final concentration of 700 ng, then diluted by adding 24  $\mu$ l nuclease free water. Adapters were then ligated using NEBNext Quick Ligation Module (New England Biolabs, E6056). Pooled DNA (700 ng) was then mixed with 20  $\mu$ l Barcode Adapter Mix, 20  $\mu$ l NEBNext Quick Ligation Reaction Buffer, and 10  $\mu$ l Quick T4 DNA Ligase. Reaction mix was then incubated for 10 min at room temperature, and DNA was then purified by adding 62  $\mu$ l AMPure XP beads Beckman Coulter, A63880), incubated on a hula mixer at room temperature for 5 min, spun down, and pelleted on a magnet, and supernatant was discarded. Beads were then resuspended in 140  $\mu$ l Adapter Bead Buffer (ABB) by flicking the tube, pelleted on magnet, and supernatant was discarded (resuspension step was repeated). Pellet was resuspended in 15  $\mu$ l Elution Buffer, incubated for 10 min at room temperature, pelleted on magnet until the elute is clear, and finally 15  $\mu$ l clear elute was transferred into Eppendorf DNA LoBind tube.

Priming mix was prepared by adding 576  $\mu$ l RBF to 624  $\mu$ l nuclease-free water, then 800  $\mu$ l priming mix was loaded on the flow cell using priming port dropwise to avoid the introduction of air bubbles. Five minutes later, SpotON sample cover on MinION was opened and 200  $\mu$ l priming mix was loaded. DNA library was prepared for loading by adding 12  $\mu$ l DNA library to 35  $\mu$ l RBF, 25.5  $\mu$ l LLB, and 2.5  $\mu$ l nuclease-free water. DNA library was gently mixed, loaded on the flow cell (FLO-MIN 106 R9 version, FAF19356) through SpotON port. Library was then sequenced for 48 hours with live base-calling.

### **Raw sequencing data and SNPs functional analysis**

Raw barcoded sequence reads were demultiplexed into six fastq files using Porechop (Wylie et al., 1996). Quality of demultiplexed sequence reads were assessed using Nanopack (De Coster et al., 2018). Sequence reads were then aligned to reference human genome (GRCh38.p92) using minimap2 (Li, 2018) “-ax map-ont”, sam files were then sorted and converted into bam files using SAMtools (Li et al., 2009). Bam files were down-sampled using SAMtools “-s 0.1 to -s 0.9”, and the quality of aligned reads were assessed using Nanopack (De Coster et al., 2018). Depth of

coverage analysis was done using deepTools2 (Ramirez et al., 2016). Sequence reads were indexed and variants were called using Nanopolish (Loman et al., 2015). Variant call format files containing called SNPs were processed and analyzed using several tools including VCFtools (Danecek et al., 2011), SnpSift (Cingolani et al., 2012), and BCFtools (Narasimhan et al., 2016). SNPs functional annotation analysis was done using DeepSEA (Zhou and Troyanskaya, 2015), R (RCORETeam) and BiomaRt (Durinck et al., 2009) Bioconductor package that includes multiple ensemble gene regulation database. Conservation analysis was done using SnpSift (Cingolani et al., 2012) and PhastCons dataset that includes genome-wide multiple alignments with other 99 vertebrate species. (<http://hgdownload.cse.ucsc.edu/goldenpath/hg38/phastCons100way>)

### **Genotype imputation analysis**

First the vcf file containing the original GWAS dataset (23 genotypes in six samples) (Visscher et al., 2012) was converted to plink bed format that is compatible with the downstream analysis in SHAPEIT, using Plink “--make-bed” (Purcell et al., 2007). We then checked the alignment of SNPs between the GWAS dataset and the 1000 genomes phase I reference panel using SHAPEIT “shapeit -check” (Delaneau et al., 2011). GWAS genotypes were then phased using SHAPEIT using 1000 genomes phase I haplotype reference panel. Additional SNPs that are not present on the GWAS genotyping platform were then imputed using the pre-phased GWAS genotypes with 1000 genomes phase I haplotype reference panel using “impute2 use\_prephased\_g - known\_haps\_g” in IMPUTE2 (Howie et al., 2009).

### **Supplementary References**

- Aminkeng, F., et al. 2015. A coding variant in RARG confers susceptibility to anthracycline-induced cardiotoxicity in childhood cancer. *Nat Genet*, 47, 1079-84.
- Burridge, P. W., Diecke, S., Matsa, E., Sharma, A., Wu, H. & Wu, J. C. 2016. Modeling Cardiovascular Diseases with Patient-Specific Human Pluripotent Stem Cell-Derived Cardiomyocytes. *Methods Mol Biol*, 1353, 119-30.

- Burridge, P. W., Holmstrom, A. & Wu, J. C. 2015. Chemically Defined Culture and Cardiomyocyte Differentiation of Human Pluripotent Stem Cells. *Curr Protoc Hum Genet*, 87, 21 3 1-15.
- Cingolani, P., Patel, V. M., Coon, M., Nguyen, T., Land, S. J., Ruden, D. M. & Lu, X. 2012. Using *Drosophila melanogaster* as a Model for Genotoxic Chemical Mutational Studies with a New Program, SnpSift. *Front Genet*, 3, 35.
- Danecek, P., et al. 2011. The variant call format and VCFtools. *Bioinformatics*, 27, 2156-8.
- De Coster, W., D'hert, S., Schultz, D. T., Cruys, M. & Van Broeckhoven, C. 2018. NanoPack: visualizing and processing long-read sequencing data. *Bioinformatics*, 34, 2666-2669.
- Delaneau, O., Marchini, J. & Zagury, J. F. 2011. A linear complexity phasing method for thousands of genomes. *Nat Methods*, 9, 179-81.
- Durinck, S., Spellman, P. T., Birney, E. & Huber, W. 2009. Mapping identifiers for the integration of genomic datasets with the R/Bioconductor package biomaRt. *Nature Protocols*, 4, 1184-1191.
- Howie, B. N., Donnelly, P. & Marchini, J. 2009. A flexible and accurate genotype imputation method for the next generation of genome-wide association studies. *PLoS Genet*, 5, e1000529.
- Li, H. 2018. Minimap2: pairwise alignment for nucleotide sequences. *Bioinformatics*, 34, 3094-3100.
- Li, H., Handsaker, B., Wysoker, A., Fennell, T., Ruan, J., Homer, N., Marth, G., Abecasis, G., Durbin, R. & Genome Project Data Processing, S. 2009. The Sequence Alignment/Map format and SAMtools. *Bioinformatics*, 25, 2078-9.
- Loman, N. J., Quick, J. & Simpson, J. T. 2015. A complete bacterial genome assembled de novo using only nanopore sequencing data. *Nat Methods*, 12, 733-5.

- Narasimhan, V., Danecek, P., Scally, A., Xue, Y., Tyler-Smith, C. & Durbin, R. 2016. BCFtools/RoH: a hidden Markov model approach for detecting autozygosity from next-generation sequencing data. *Bioinformatics*, 32, 1749-51.
- Purcell, S., et al. 2007. PLINK: a tool set for whole-genome association and population-based linkage analyses. *Am J Hum Genet*, 81, 559-75.
- Ramirez, F., Ryan, D. P., Gruning, B., Bhardwaj, V., Kilpert, F., Richter, A. S., Heyne, S., Dundar, F. & Manke, T. 2016. deepTools2: a next generation web server for deep-sequencing data analysis. *Nucleic Acids Res*, 44, W160-5.
- Rcoreteam R: A Language and Environment for Statistical Computing.
- Visscher, H., et al. 2012. Pharmacogenomic prediction of anthracycline-induced cardiotoxicity in children. *Journal of Clinical Oncology: Official Journal of the American Society of Clinical Oncology*, 30, 1422-1428.
- Visscher, H., et al. 2013. Validation of variants in SLC28A3 and UGT1A6 as genetic markers predictive of anthracycline-induced cardiotoxicity in children. *Pediatric Blood & Cancer*, 60, 1375-1381.
- Wylie, C., Kofron, M., Payne, C., Anderson, R., Hosobuchi, M., Joseph, E. & Heasman, J. 1996. Maternal beta-catenin establishes a 'dorsal signal' in early *Xenopus* embryos. *Development*, 122, 2987-96.
- Zhou, J. & Troyanskaya, O. G. 2015. Predicting effects of noncoding variants with deep learning-based sequence model. *Nat Methods*, 12, 931-4.
